# Supplementary material for: Enantioselective Synthesis and Pharmacological Evaluation of Aza-CGP37157–Lipoic Acid Hybrids for the Treatment of Alzheimer’s Disease
Source: MDPI journal article supplement (doi:10.3390/antiox11010112), 2022-01-04
Supplement: s1 [file s1]

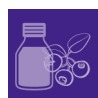

# Supplementary Material: Enantioselective Synthesis and Pharmacological Evaluation of Aza-CGP37157–Lipoic Acid Hybrids for the Treatment of Alzheimer’s Disease

Ángel Cores <sup>1,†</sup>, Patrycja Michalska <sup>2,†</sup>, José Miguel Pérez <sup>1</sup>, Enrique Crisman <sup>3,4</sup>, Clara Gómez <sup>4</sup>, Mercedes Villacampa <sup>1</sup>, José Carlos Menéndez <sup>1,\*</sup> and Rafael León <sup>4,\*</sup>

<sup>1</sup> Unidad de Química Orgánica y Farmacéutica, Departamento de Química en Ciencias Farmacéuticas, Facultad de Farmacia, Universidad Complutense, 28040 Madrid, Spain; acores@ucm.es (Á.C.); josemigp@ucm.es (J.M.P.); mvsanz@ucm.es (M.V.)

<sup>2</sup> Department of Chemistry, Imperial College London, SW7 2BX London, UK; p.dziama@imperial.ac.uk

<sup>3</sup> Instituto de Investigación Sanitaria, Hospital Universitario de la Princesa, 28006 Madrid, Spain; ecrisman@outlook.com

<sup>4</sup> Instituto de Química Médica, Consejo Superior de Investigaciones Científicas (IQM-CSIC), 28006 Madrid, Spain; clara.gomezterrano@estudiante.uam.es

\* Correspondence: josecm@ucm.es (J.C.M.); rafael.leon@iqm.csic.es (R.L.)

† These authors contributed equally.

**Table S1.** Nrf2 induction of compounds in the AREc32 cell line expressed as CD values. AREc32 cells were treated with increasing concentrations (0.3, 3, 10 and 30  $\mu$ M) of the corresponding compound for 24 h and thereafter, luciferase activity was measured. Data are expressed as the concentration required to double the specific luciferase activity (CD).

| Entry | Compound            | CD ( $\mu$ M)                 |
|-------|---------------------|-------------------------------|
| 1     | CGP37157            | ~[2]                          |
| 2     | S-Lipoic acid       | >600                          |
| 3     | R-Lipoic acid       | >600                          |
| 4     | <i>rac</i> -3a      | 14.8 $\pm$ 1.6 <sup>[3]</sup> |
| 5     | ( <i>rac,R</i> )-3b | 9.8 $\pm$ 1.6 <sup>[3]</sup>  |
| 6     | ( $\pm$ )-6         | > 30 <sup>[2]</sup>           |
| 7     | R-6                 | 11.8 $\pm$ 0.5                |
| 8     | S-6                 | 14.4 $\pm$ 0.2                |
| 9     | (S,S)-7a            | 26.5 $\pm$ 1.3                |
| 10    | (S,R)-7b            | 11.9 $\pm$ 1.3                |
| 11    | (R,S)-7c            | > 30                          |
| 12    | (R,R)-7d            | > 30                          |

Data are means  $\pm$  SEM of at least five different experiments in duplicate.

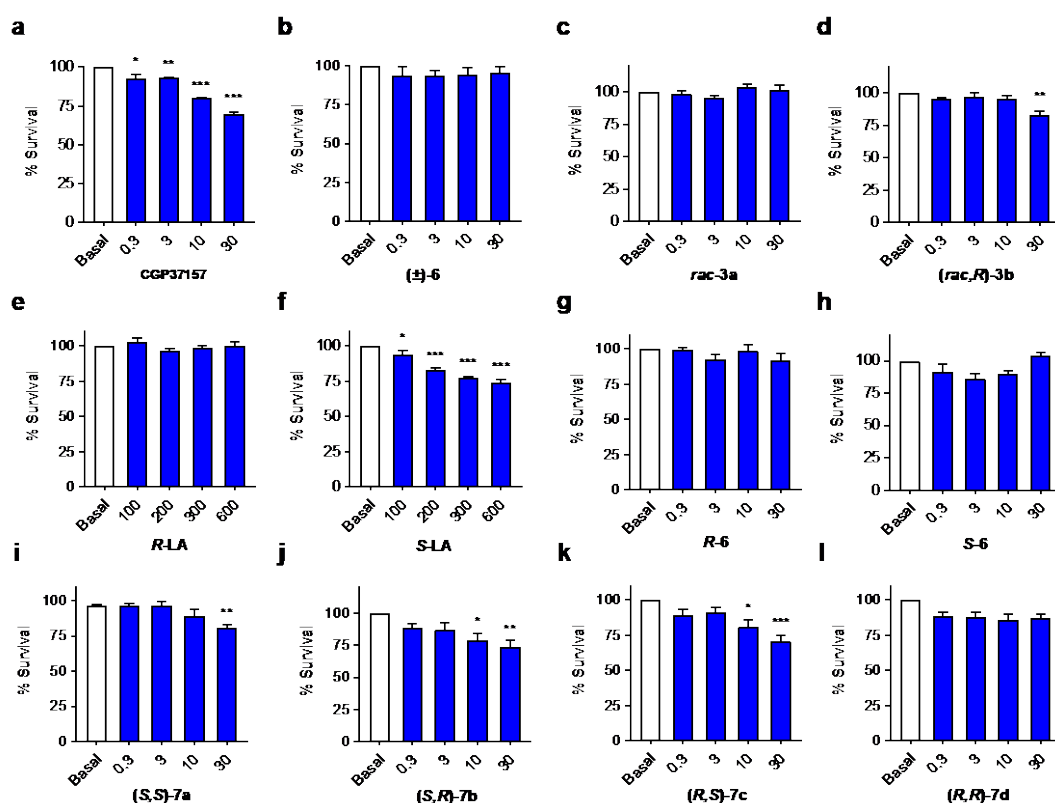

**Figure S1.** Cytotoxicity of CGP37157, 3, 6, LA and 7 in the ARec32 cell line. ARec32 cells were treated with each compound at desired concentration (0.3, 3, 10 and 30 μM) for 24 h. Thereafter, cell viability was assessed by the MTT method. Data are means of five different cultures in duplicate. \* $p < 0.05$ , \*\* $p < 0.01$ , \*\*\* $p < 0.001$  compared to basal.

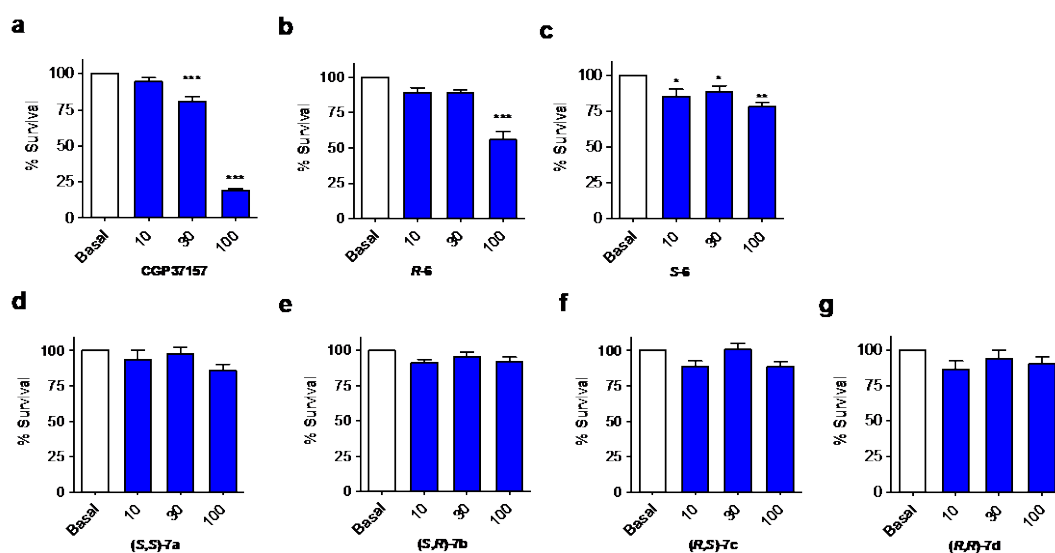

**Figure S2.** Cytotoxicity of CGP37157, 6 and 7 in the SH-SY5Y cell line. SH-SY5Y cells were treated with increasing concentrations of each compound (10, 30 and 100 μM) for 24 h. Thereafter, cell viability was assessed by the MTT method. Data are means of three different cultures in duplicate. \* $p < 0.05$ , \*\* $p < 0.01$ , \*\*\* $p < 0.001$  compared to basal.

**Figure S3:** WB original images

HO-1  
β-actin

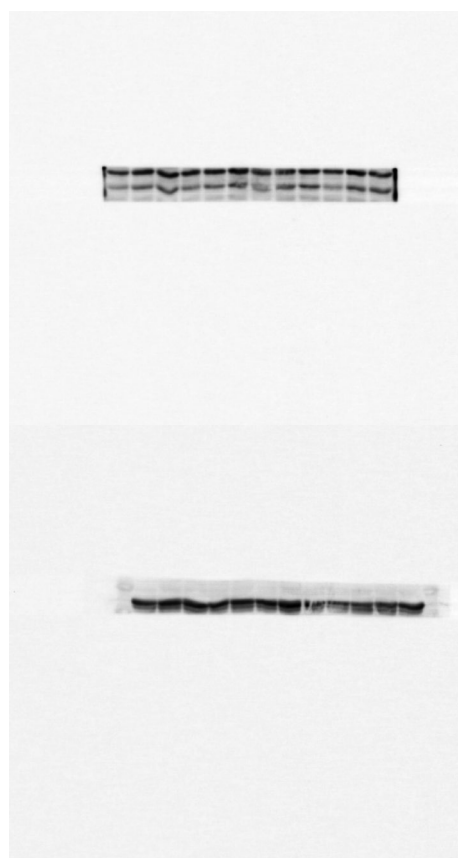

GCLc  
β-actin

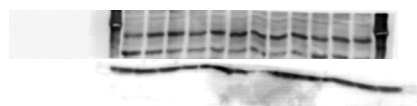

**Table S2.** Neuroprotective effect of compounds in SH-SY5Y cells against the toxic combination R/O. Compounds were pre-incubated (1  $\mu$ M) for 24 h, then media was replaced for fresh medium containing compounds and R/O (30/10  $\mu$ M) for another 24 h. Viability was assessed by the MTT method.

| Entry | Compound | % Survival                    | % Protection       |
|-------|----------|-------------------------------|--------------------|
| 1     | Basal    | 100.0                         |                    |
| 2     | R/O      | 53.4 $\pm$ 6.3 <sup>###</sup> |                    |
| 3     | Mel      | 68.0 $\pm$ 1.5                | 46.1 <sup>**</sup> |

|    |                   |            |         |
|----|-------------------|------------|---------|
| 7  | <b>CGP37157</b>   | 76.2 ± 5.7 | 46.2*** |
| 4  | <b>rac-3a</b>     | 69.0 ± 5.6 | 52.1**  |
| 5  | <b>(rac,R)-3b</b> | 72.9 ± 3.5 | 59.3**  |
| 6  | <b>(±)-6</b>      | 74.4 ± 4.1 | 44.1*** |
| 8  | <b>R-6</b>        | 75.1 ± 2.9 | 45.7*** |
| 9  | <b>S-6</b>        | 74.7 ± 2.5 | 51.5*** |
| 10 | <b>(S,S)-7a</b>   | 74.8 ± 3.2 | 43.4*** |
| 11 | <b>(S,R)-7b</b>   | 81.0 ± 4.7 | 61.1*** |
| 12 | <b>(R,S)-7c</b>   | 76.1 ± 2.9 | 47.2*** |
| 13 | <b>(R,R)-7d</b>   | 77.6 ± 4.4 | 50.7*** |

Data are means of five different cultures in duplicate. ### $p < 0.001$  compared to basal; \*\* $p < 0.01$ , \*\*\* $p < 0.001$  compared to R/O.

**Table S3.** Neuroprotective effect of compounds in SH-SY5Y cells against OA. Compounds were pre-incubated (1  $\mu$ M) for 24 h, then media was replaced for fresh medium containing compounds and OA (30/10  $\mu$ M) for another 24 h. Viability was assessed by the MTT method.

| Entry | Compound        | % Survival    | % Protection      |
|-------|-----------------|---------------|-------------------|
| 1     | Basal           | 100.0         |                   |
| 2     | OA              | 54.7 ± 4.7### |                   |
| 3     | Mel             | 70.3 ± 4.3    | 31.1*             |
| 5     | <b>CGP37157</b> | 78.8 ± 6.1    | 56.3**            |
| 4     | <b>(±)-6</b>    | 69.1 ± 6.4    | 33.4*             |
| 6     | <b>R-6</b>      | 59.3 ± 10.6   | 14.2              |
| 7     | <b>S-6</b>      | 71.5 ± 10.0   | 41.9*             |
| 9     | <b>(S,S)-7a</b> | 63.2 ± 7.6    | 21.2              |
| 8     | <b>(S,R)-7b</b> | 70.6 ± 10.3   | 40.2*             |
| 11    | <b>(R,S)-7c</b> | 50.7 ± 15.6   | n.p <sup>\$</sup> |
| 10    | <b>(R,R)-7d</b> | 63.3 ± 8.7    | 21.0              |

Data are means of five different cultures in duplicate. ### $p < 0.001$  compared to basal; \*\* $p < 0.01$ , \*\*\* $p < 0.001$  compared to R/O. n.p<sup>\$</sup> compound does not protect cells.

**Table S4.** Calculated and experimental elemental analysis.

| Compound | Formula                                                           | Calculated |      |       |      | Found |      |       |      |
|----------|-------------------------------------------------------------------|------------|------|-------|------|-------|------|-------|------|
|          |                                                                   | %C         | %H   | %N    | %S   | %C    | %H   | %N    | %S   |
| 1        | C <sub>17</sub> H <sub>18</sub> Cl <sub>2</sub> N <sub>2</sub> OS | 55.29      | 4.91 | 7.59  | 8.68 | 55.06 | 4.97 | 7.71  | 8.82 |
| 2        | C <sub>17</sub> H <sub>20</sub> Cl <sub>2</sub> N <sub>2</sub> OS | 54.99      | 5.43 | 7.54  | 8.63 | 55.57 | 5.67 | 7.30  | 8.77 |
| 3        | C <sub>13</sub> H <sub>12</sub> Cl <sub>2</sub> N <sub>2</sub>    | 58.45      | 4.53 | 10.49 | --   | 58.28 | 4.39 | 10.79 | --   |
| 4        | C <sub>15</sub> H <sub>16</sub> Cl <sub>2</sub> N <sub>2</sub> O  | 57.89      | 5.18 | 9.00  | --   | 55.10 | 4.91 | 8.35  | --   |

|   |                                                                                              |       |      |      |       |       |      |      |       |
|---|----------------------------------------------------------------------------------------------|-------|------|------|-------|-------|------|------|-------|
| 5 | C <sub>19</sub> H <sub>17</sub> BrCl <sub>2</sub> N <sub>2</sub> O <sub>3</sub>              | 48.33 | 3.63 | 5.93 | --    | 48.18 | 3.52 | 5.82 | --    |
| 6 | C <sub>17</sub> H <sub>16</sub> Cl <sub>2</sub> N <sub>2</sub> O <sub>2</sub>                | 58.14 | 4.59 | 7.98 | --    | 58.46 | 4.72 | 7.74 | --    |
| 7 | C <sub>25</sub> H <sub>28</sub> Cl <sub>2</sub> N <sub>2</sub> O <sub>3</sub> S <sub>2</sub> | 55.65 | 5.23 | 5.19 | 11.88 | 55.47 | 5.08 | 5.16 | 11.75 |

### Copies of NMR spectra

(*R,Z*)-*N*-((2-Amino-5-chlorophenyl)(2-chlorophenyl)methylene)-2-methylpropane-2-sulfonamide (**R-1**)

<sup>1</sup>H NMR (250 MHz, CDCl<sub>3</sub>)

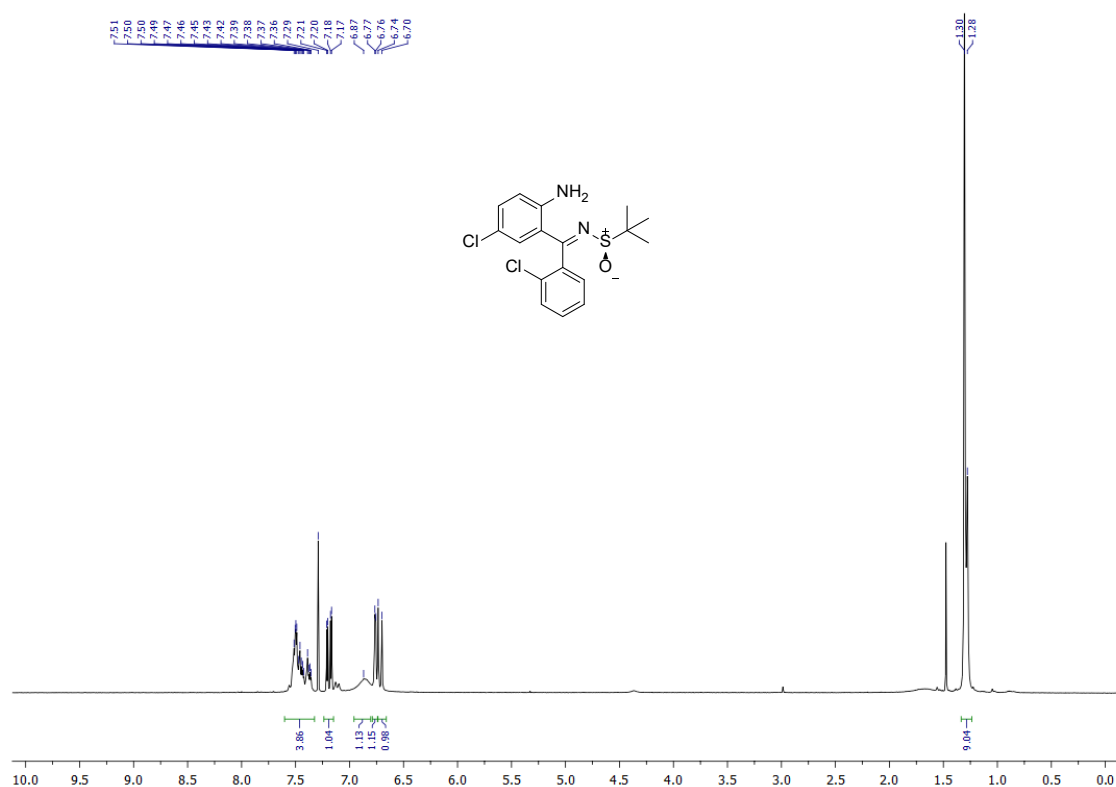

<sup>13</sup>C NMR (63 MHz, CDCl<sub>3</sub>)

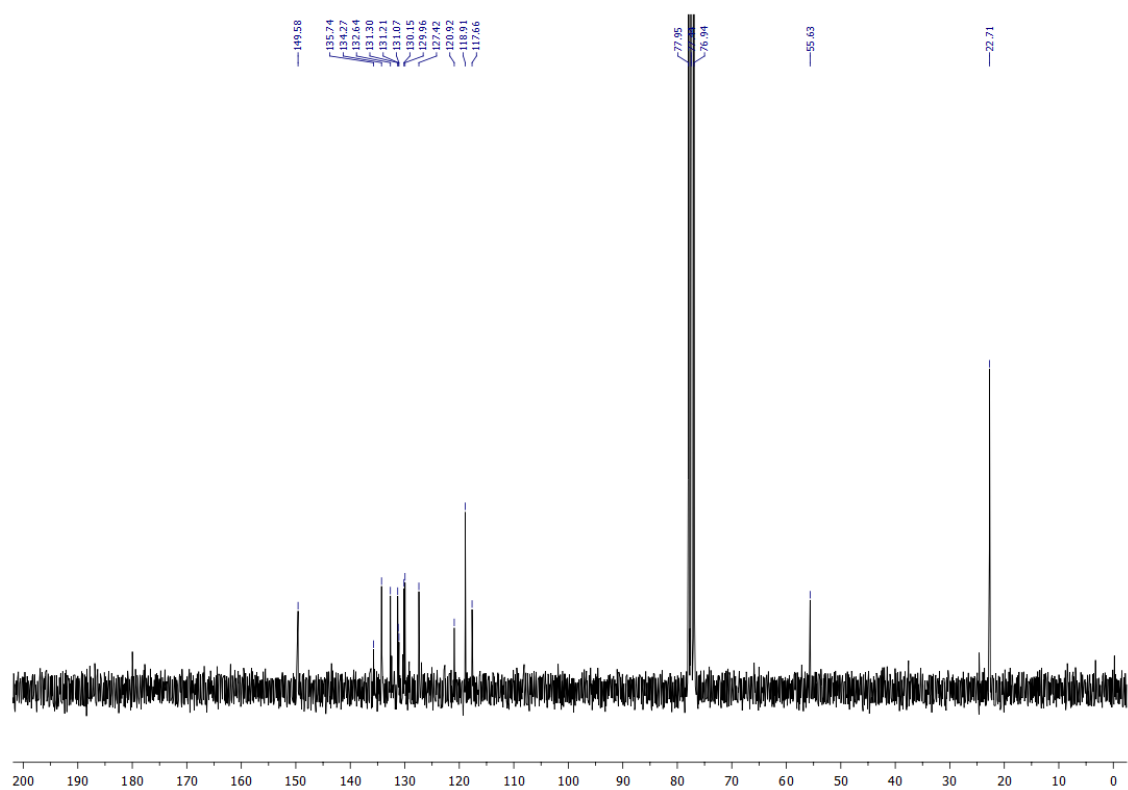

(*S,Z*)-*N*-((2-Amino-5-chlorophenyl)(2-chlorophenyl)methylene)-2-methylpropane-2-sulfonamide (**S-1**)

$^1\text{H}$  NMR (250 MHz,  $\text{CDCl}_3$ )

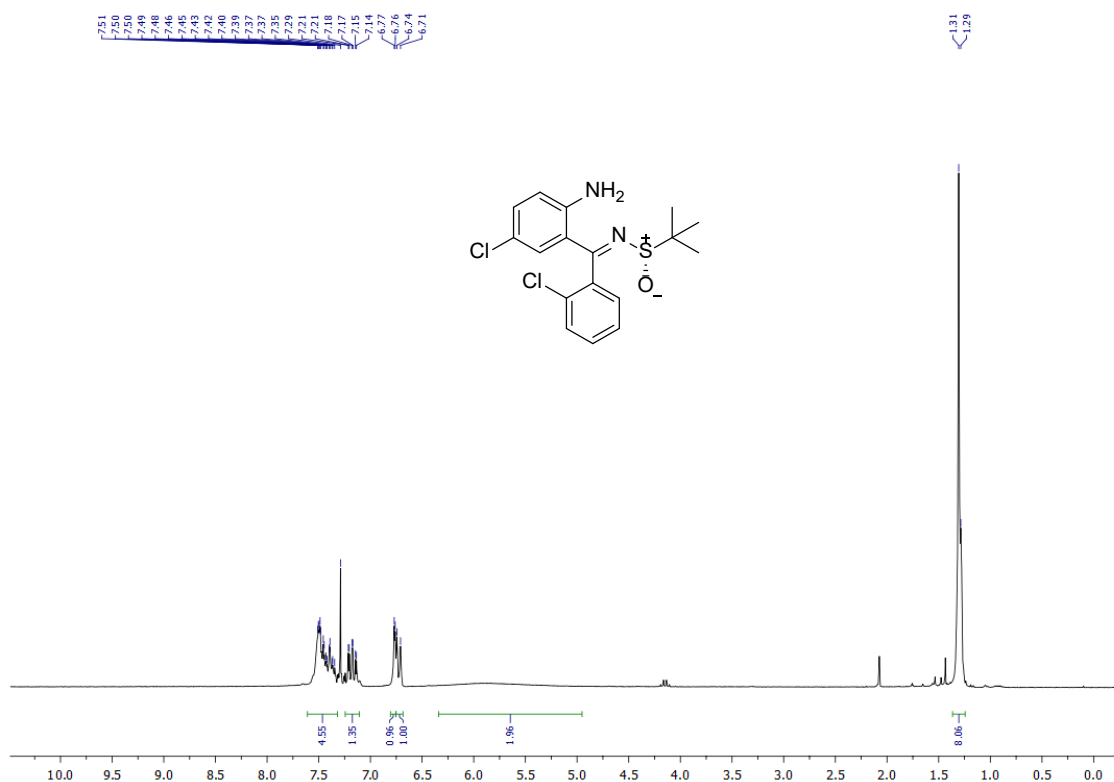

(*R*)-*N*-[(*S*)-(2-Amino-5-chlorophenyl)(2-chlorophenyl)methyl]-2-methylpropane-2-sulfonamide (*R,S*-2)

$^1\text{H}$  NMR (250 MHz,  $\text{CDCl}_3$ )

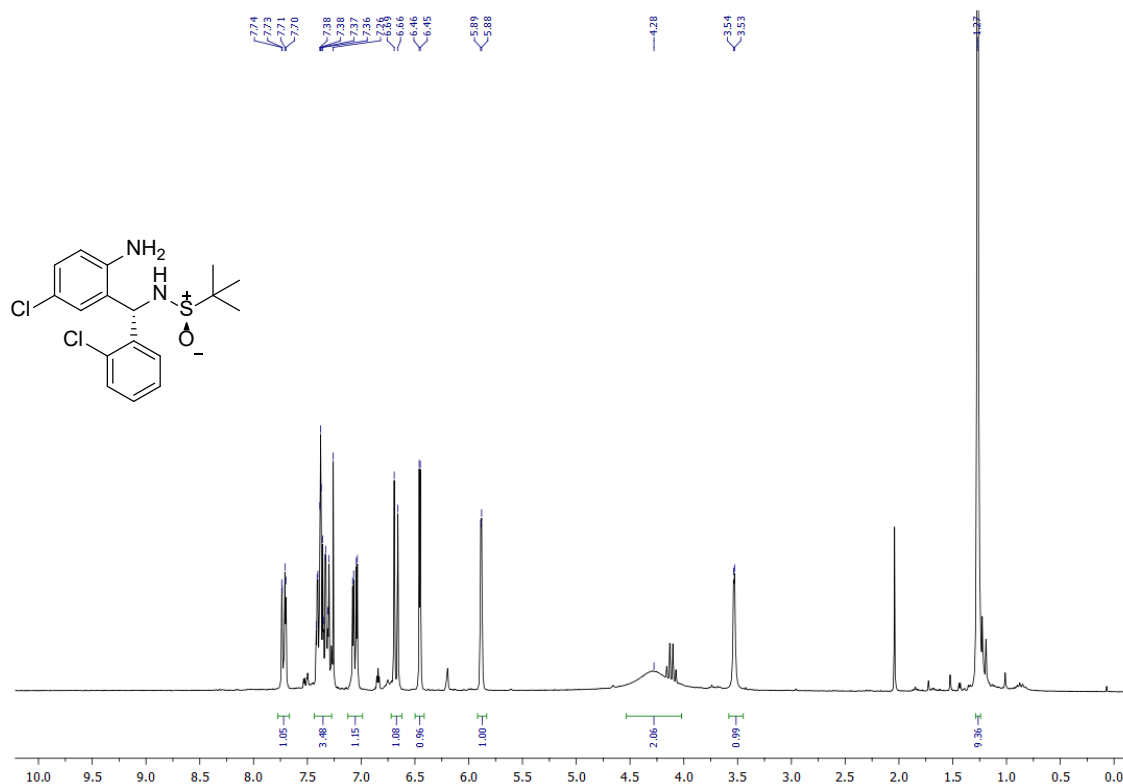

$^{13}\text{C}$  NMR (63 MHz,  $\text{CDCl}_3$ )

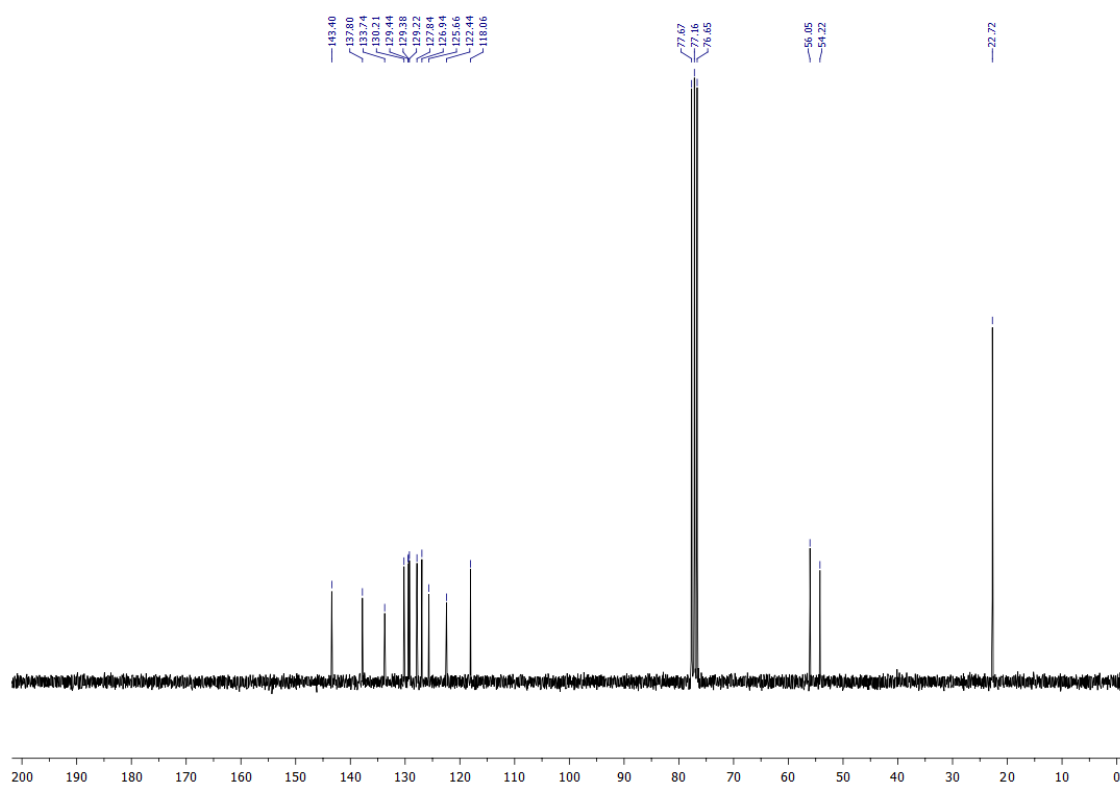



(S)-N-[(R)-(2-Amino-5-chlorophenyl)(2-chlorophenyl)methyl]-2-methylpropane-2-sulfonamide(S,R-2)

$^1\text{H}$  NMR (250 MHz,  $\text{CDCl}_3$ )

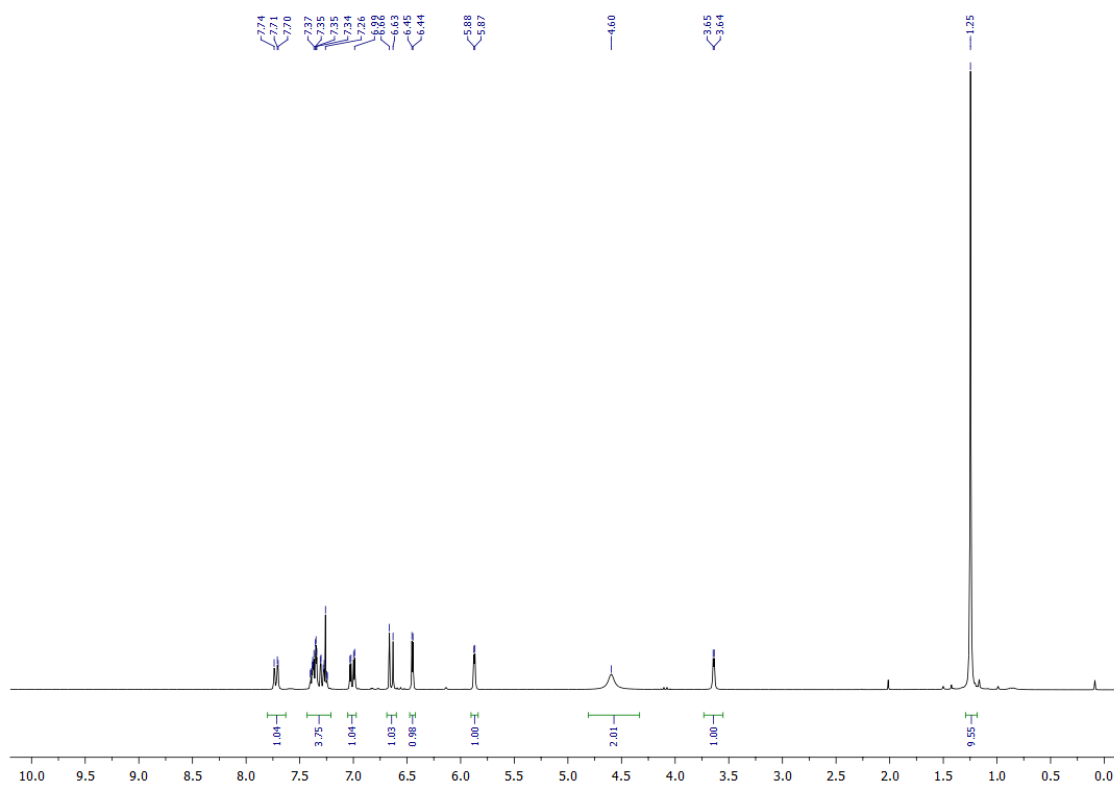

**(S)-2-[Amino(2-chlorophenyl)methyl]-4-chloroaniline (S-3)****<sup>1</sup>H NMR (250 MHz, CDCl<sub>3</sub>)**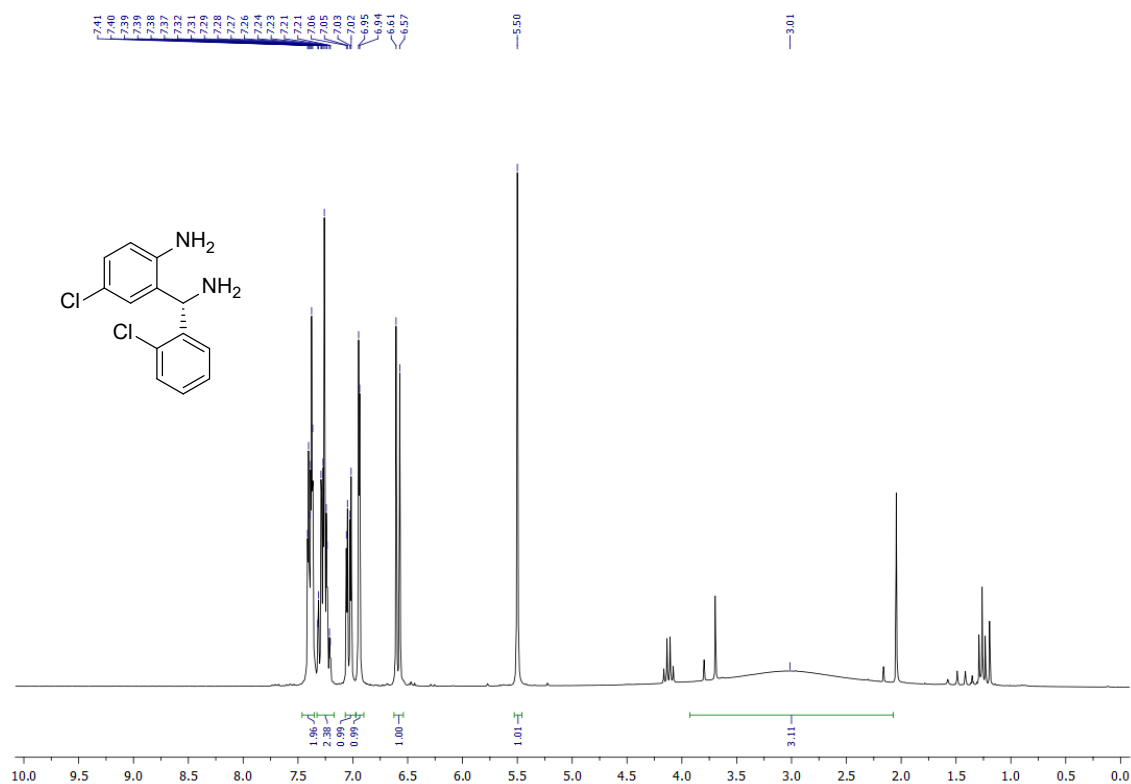**<sup>13</sup>C NMR (63 MHz, CDCl<sub>3</sub>)**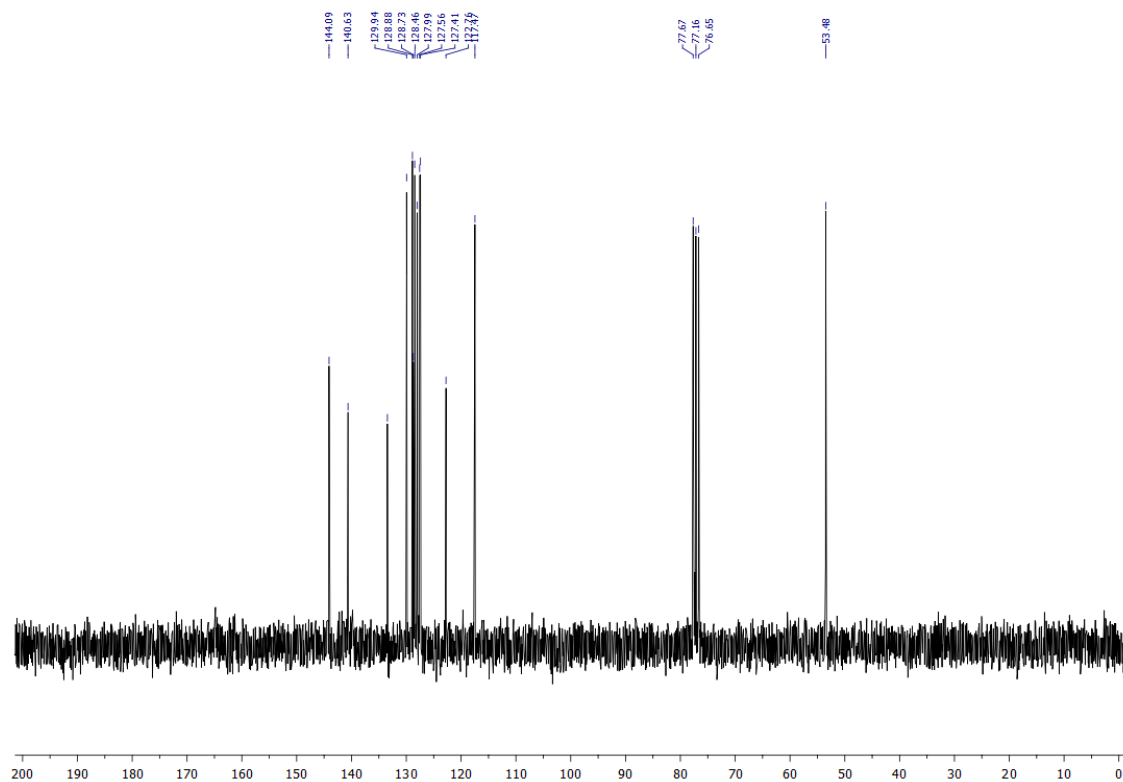**(R)-2-(Amino(2-chlorophenyl)methyl)-4-chloroaniline (R-3)**

<sup>1</sup>H NMR (250 MHz, CDCl<sub>3</sub>)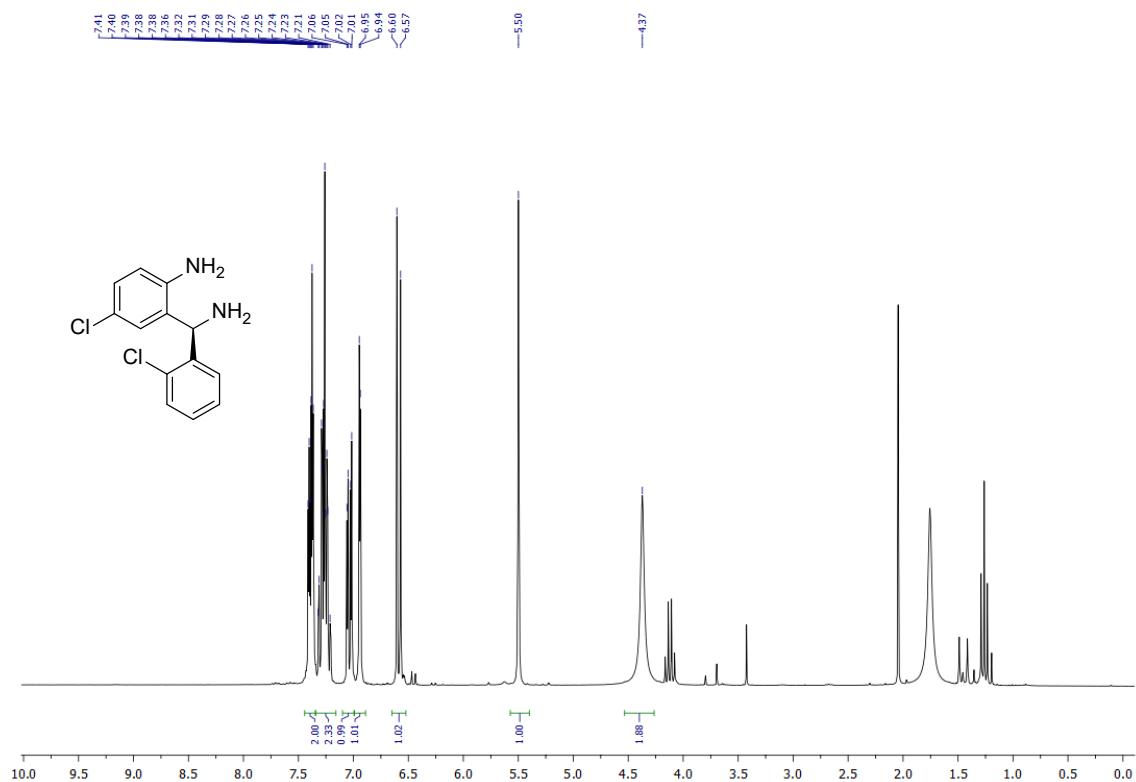

(S)-2-(((2-Amino-5-chlorophenyl)(2-chlorophenyl)methyl)amino)ethan-1-ol (S-4)

$^1\text{H}$  NMR (250 MHz,  $\text{CDCl}_3$ )

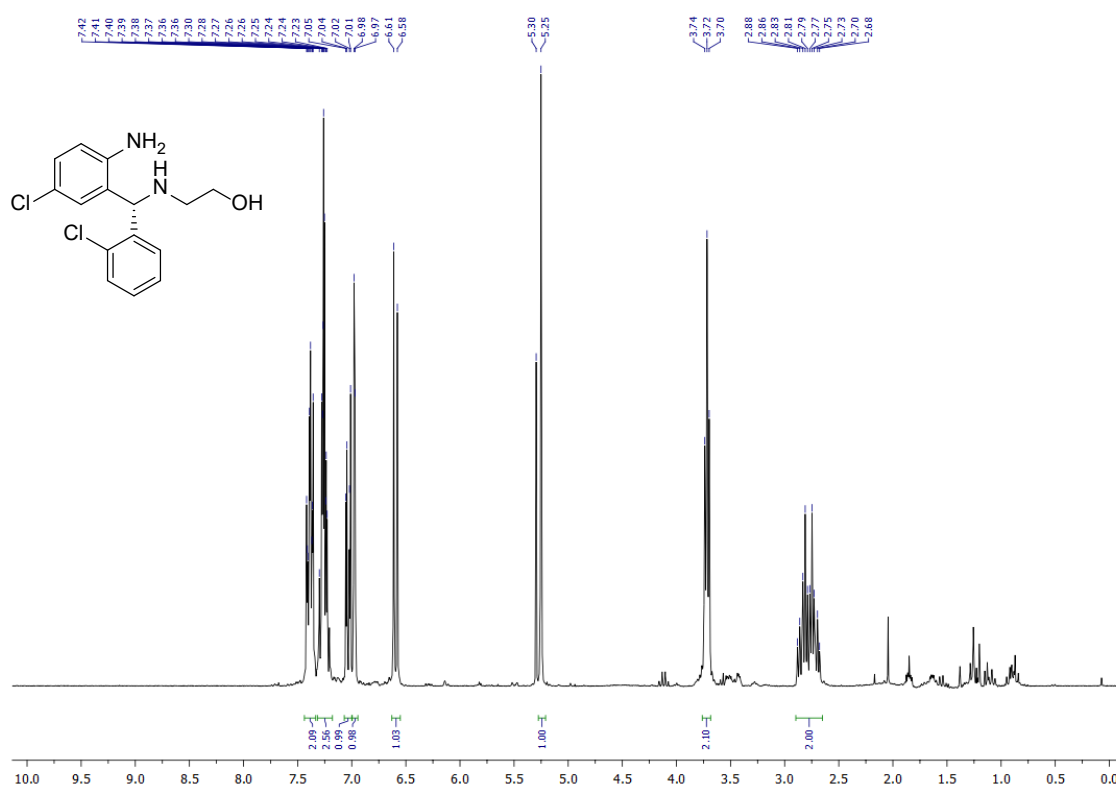

$^{13}\text{C}$  NMR (63 MHz,  $\text{CDCl}_3$ )

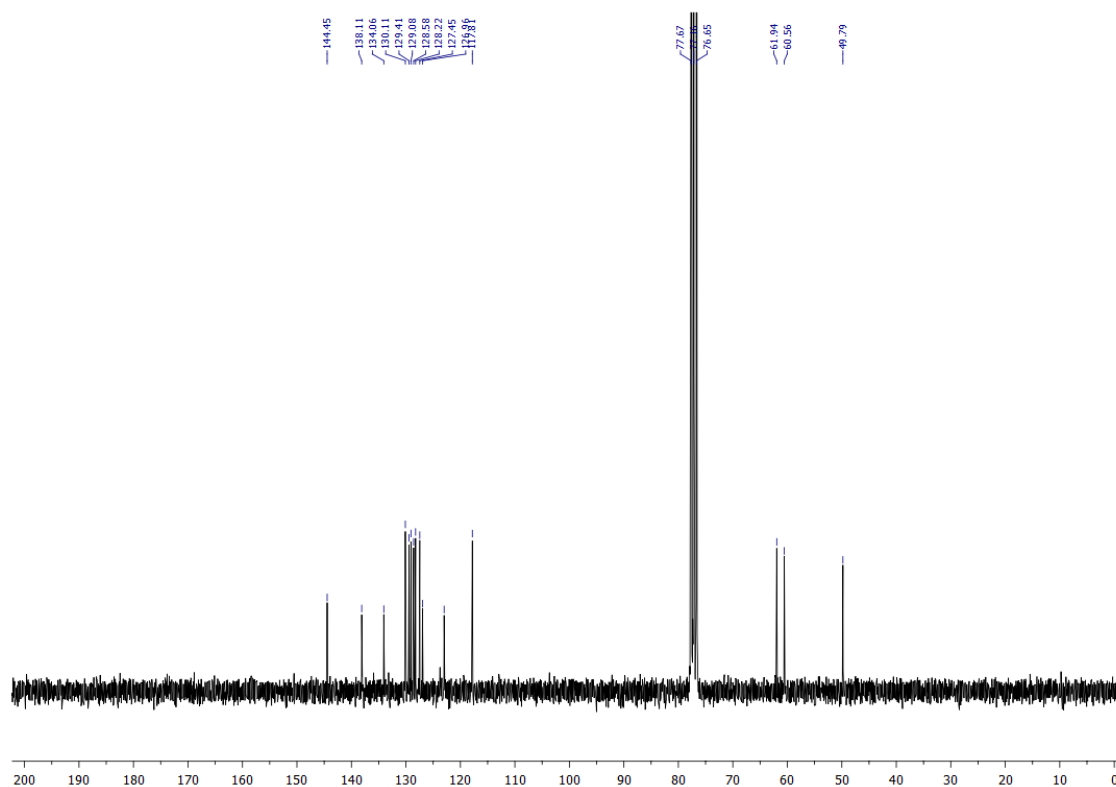

(R)-2-(((2-amino-5-chlorophenyl)(2-chlorophenyl)methyl)amino)ethan-1-ol (**R-4**)

$^1\text{H}$  NMR (250 MHz,  $\text{CDCl}_3$ )

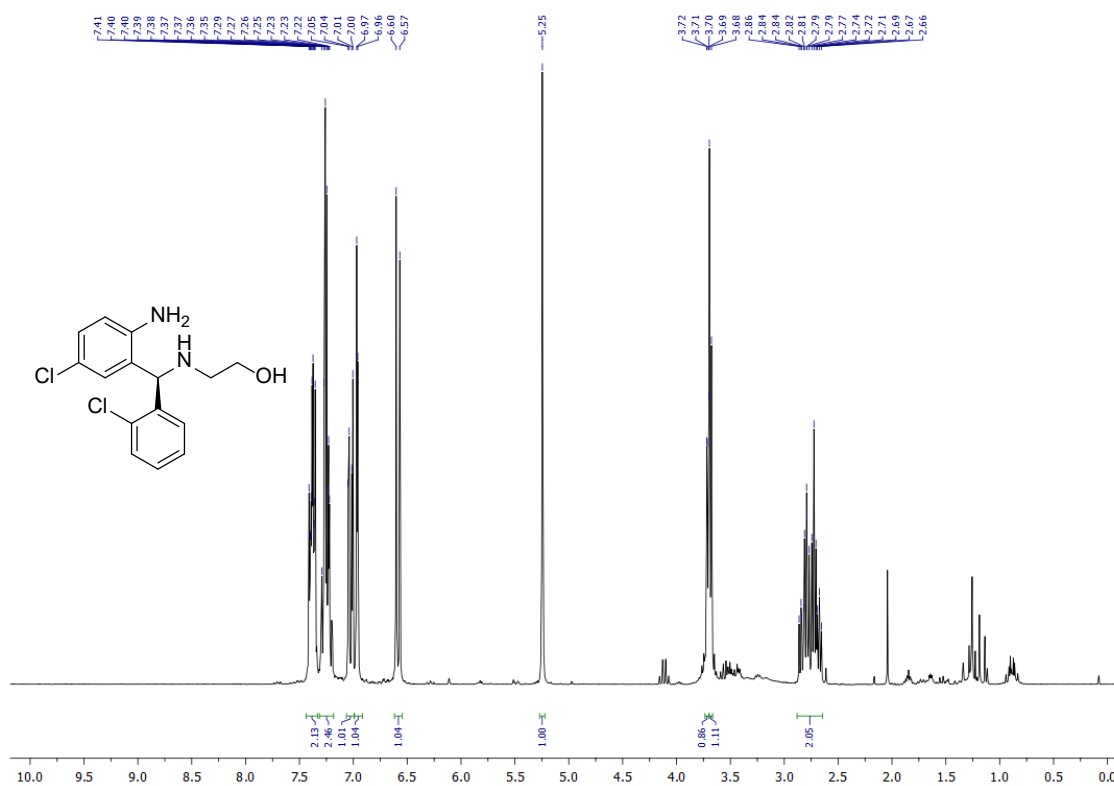

(S)-2-(7-Chloro-5-(2-chlorophenyl)-2-oxo-1,2,3,5-tetrahydro-4H-benzo[e][1,4]diazepin-4-yl)ethyl 2-bromoacetate (S-5)

$^1\text{H}$  NMR (250 MHz,  $\text{CDCl}_3$ )

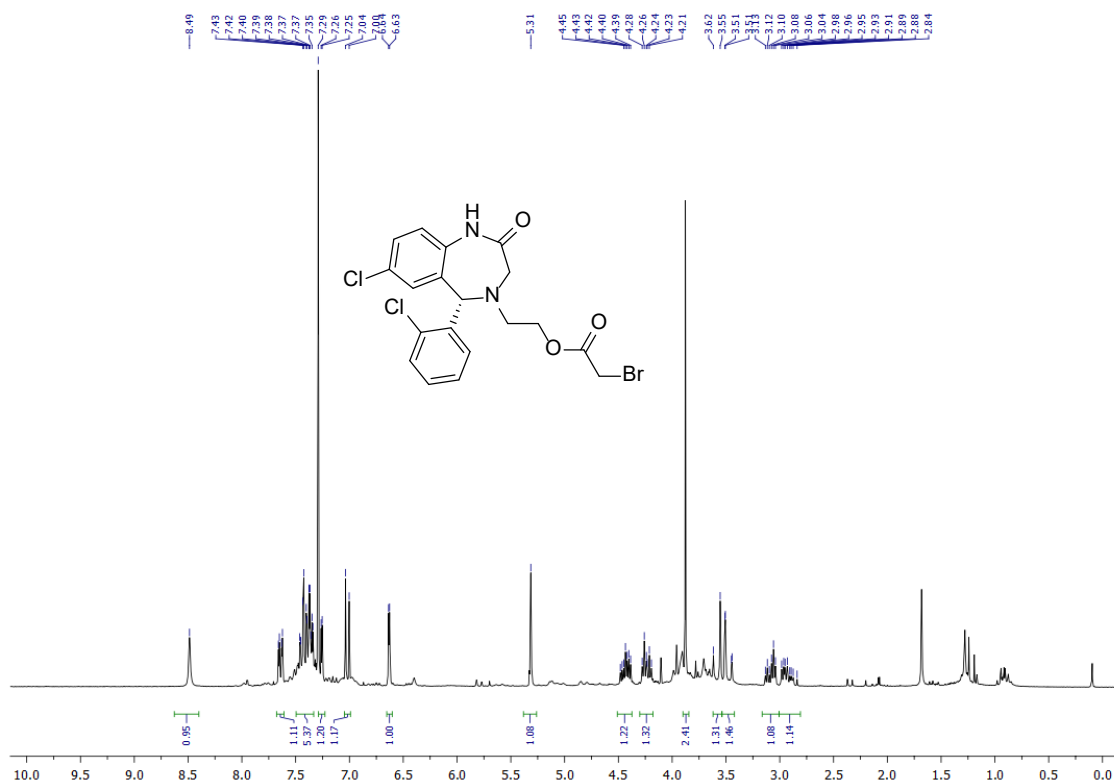

$^{13}\text{C}$  NMR (63 MHz,  $\text{CDCl}_3$ )

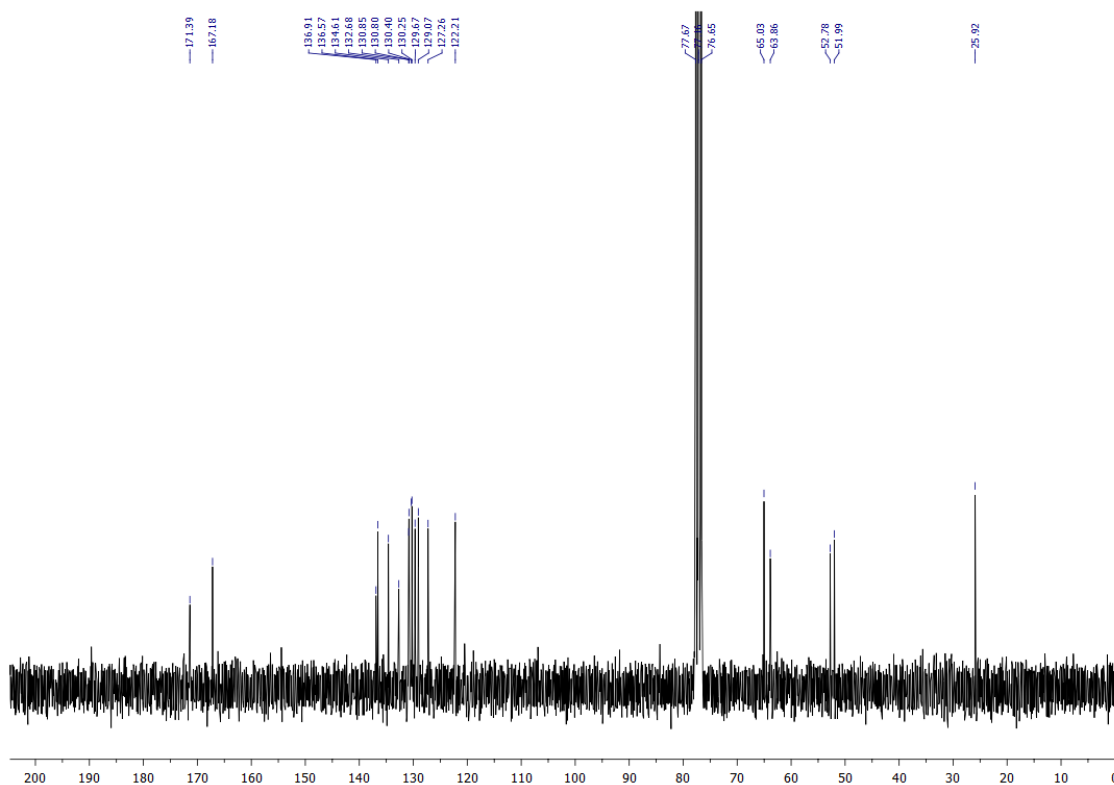

(R)-2-(7-Chloro-5-(2-chlorophenyl)-2-oxo-1,2,3,5-tetrahydro-4H-benzo[e][1,4]diazepin-4-yl)ethyl 2-bromoacetate (R-5)

$^1\text{H}$  NMR (250 MHz,  $\text{CDCl}_3$ )

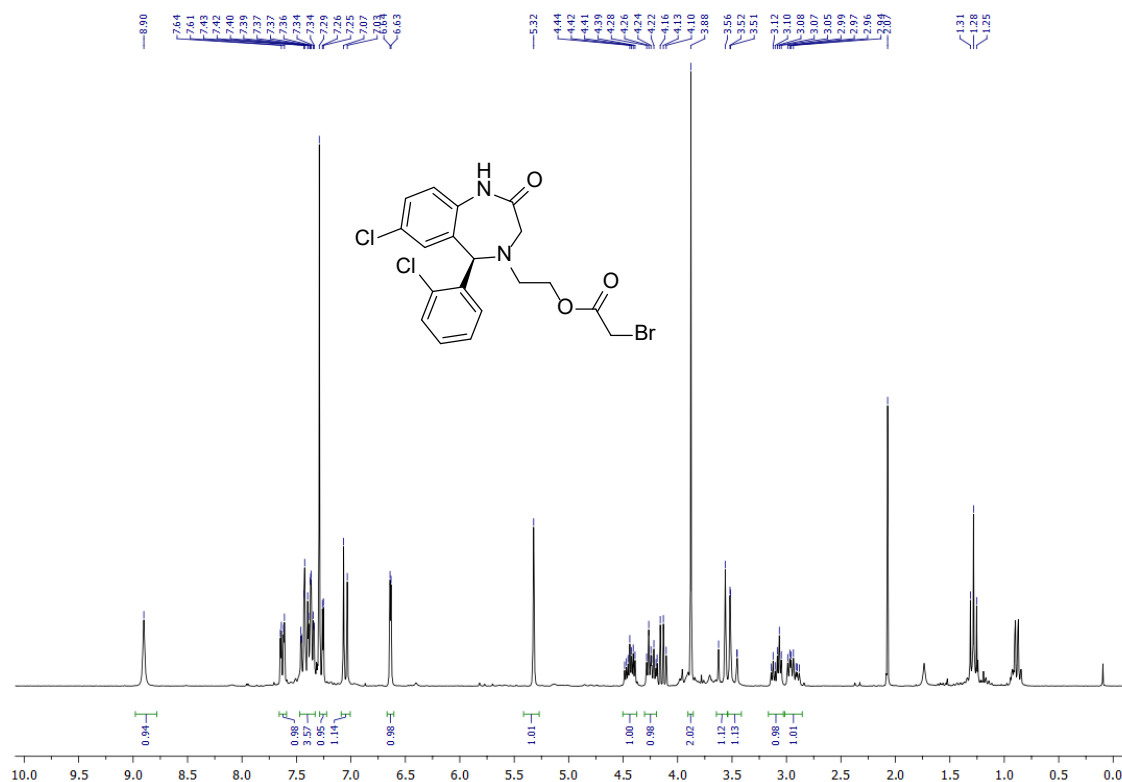

(5S)-7-Chloro-5-(2-chlorophenyl)-4-(2-hydroxyethyl)-4,5-dihydro-1H-benzo[e][1,4]diazepin-2(3H)-one (S-6)

<sup>1</sup>H NMR (250 MHz, CDCl<sub>3</sub>)

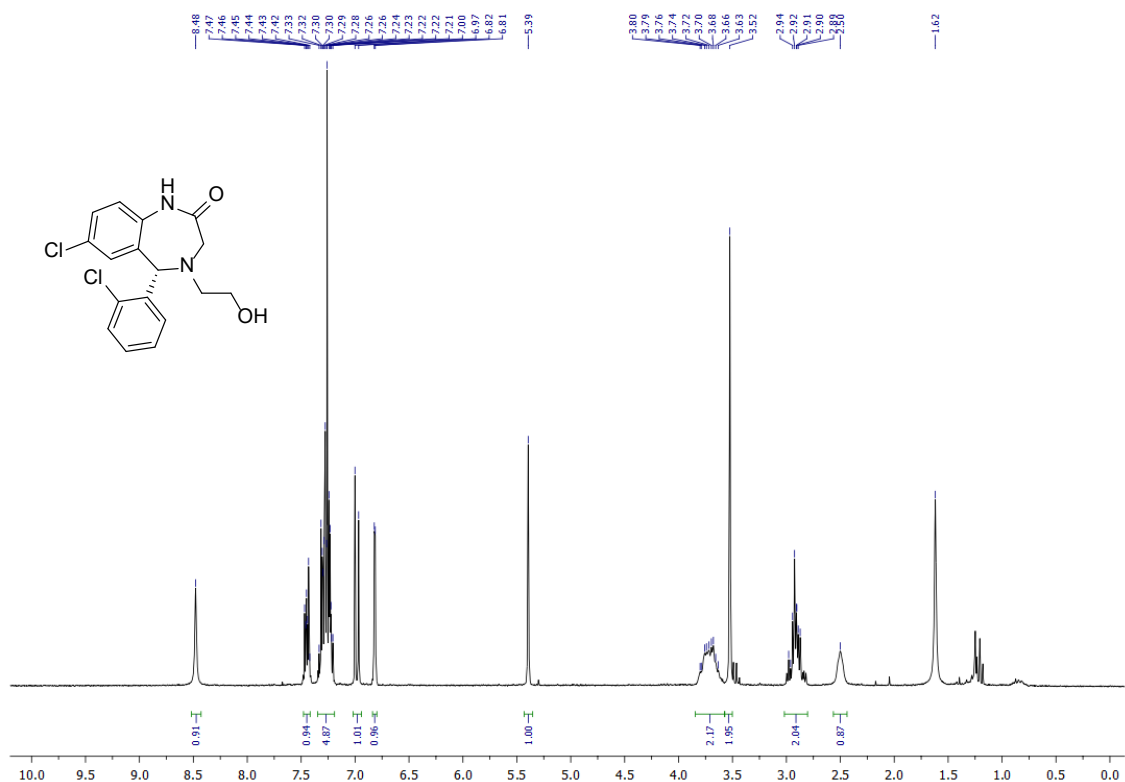

<sup>13</sup>C NMR (63 MHz, CDCl<sub>3</sub>)

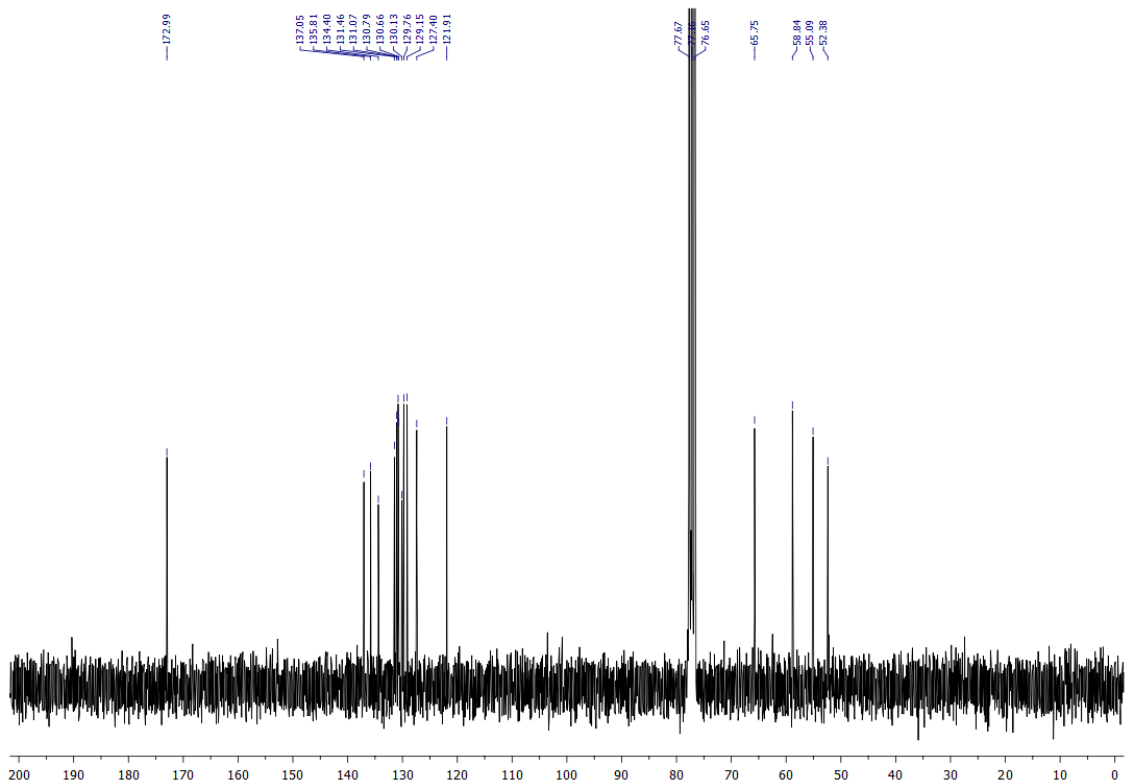



(5*R*)-7-Chloro-5-(2-chlorophenyl)-4-(2-hydroxyethyl)-4,5-dihydro-1*H*-benzo[*e*][1,4]diazepin-2(3*H*)-one (**R-6**)

<sup>1</sup>H NMR (250 MHz, CDCl<sub>3</sub>)

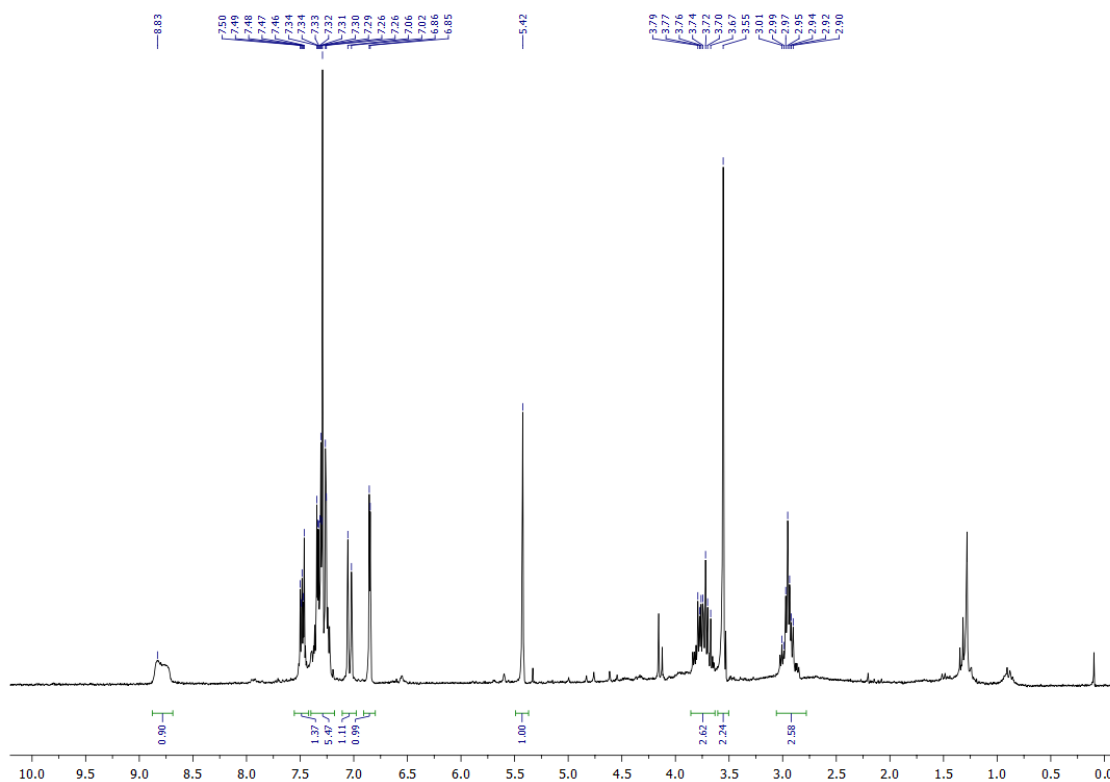

2-((*S*)-7-Chloro-5-(2-chlorophenyl)-2-oxo-1,2,3,5-tetrahydro-4*H*-benzo[*e*][1,4]diazepin-4-yl)ethyl 5-((*S*)-1,2-dithiolan-3-yl)pentanoate (**7a**)

$^1\text{H}$  NMR (250 MHz,  $\text{CDCl}_3$ )

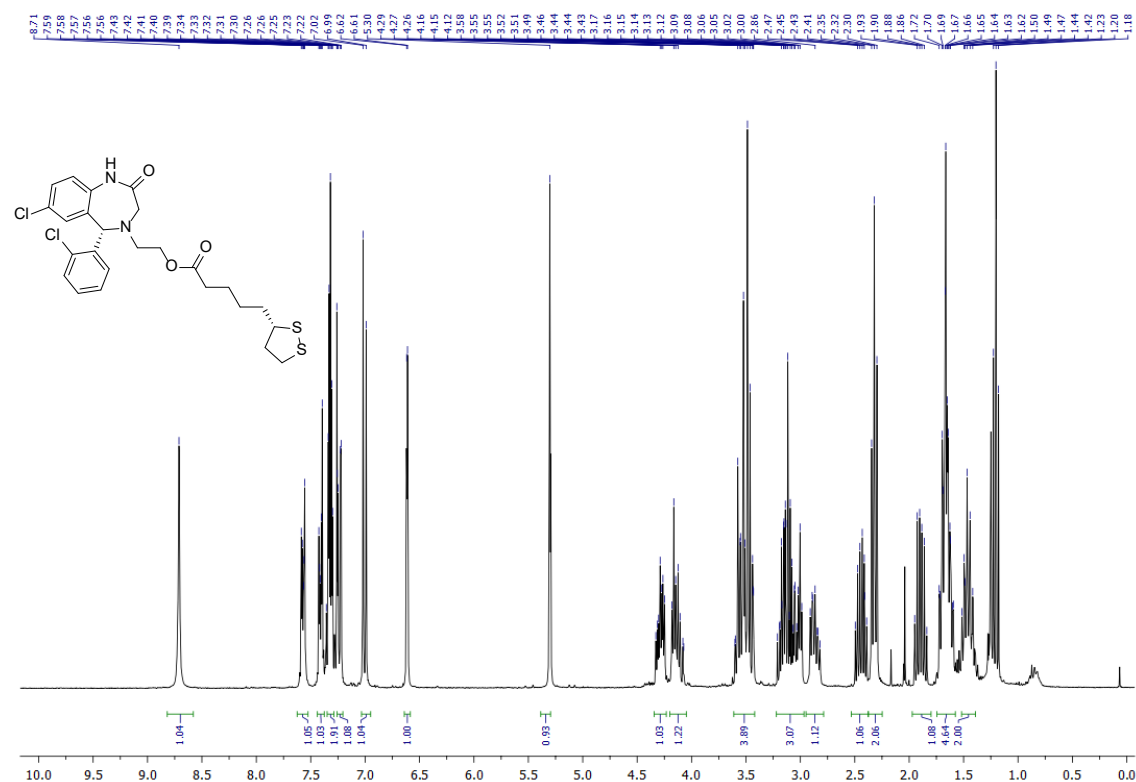

2-((*R*)-7-Chloro-5-(2-chlorophenyl)-2-oxo-1,2,3,5-tetrahydro-4*H*-benzo[*e*][1,4]diazepin-4-yl)ethyl 5-((*S*)-1,2-dithiolan-3-yl)pentanoate (**7b**)

<sup>1</sup>H NMR (250 MHz, CDCl<sub>3</sub>)

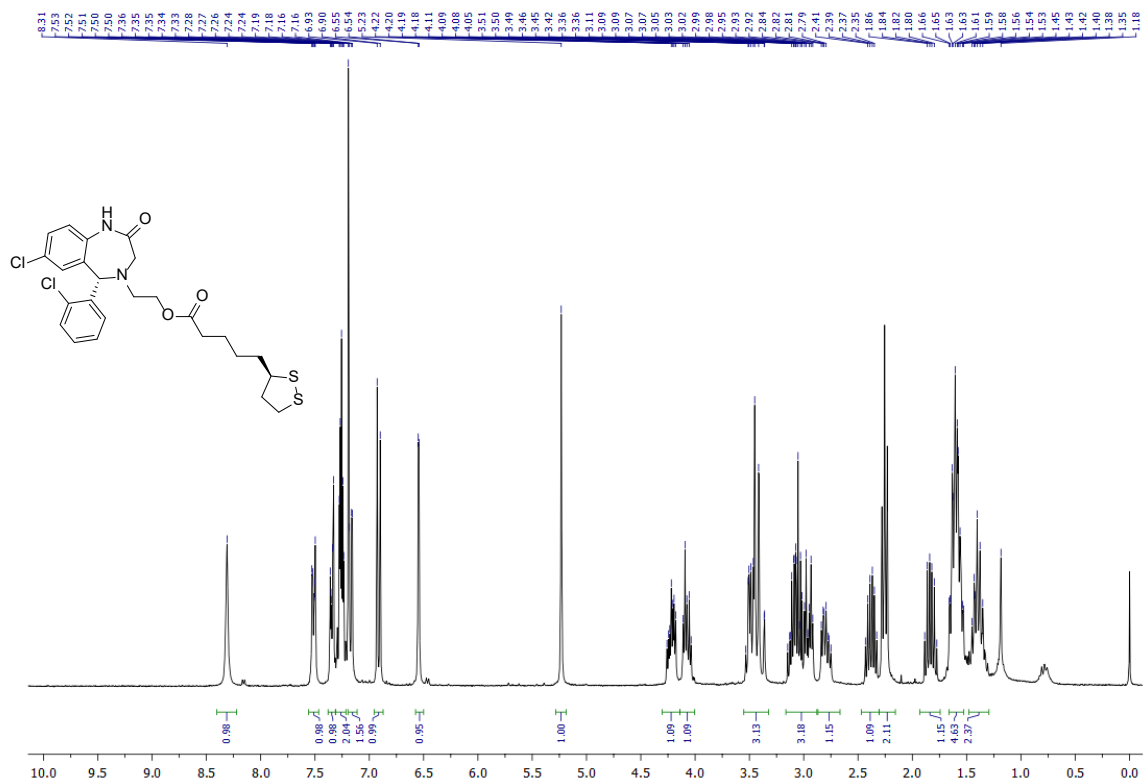

2-((*S*)-7-Chloro-5-(2-chlorophenyl)-2-oxo-1,2,3,5-tetrahydro-4*H*-benzo[*e*][1,4]diazepin-4-yl)ethyl 5-((*R*)-1,2-dithiolan-3-yl)pentanoate (**7c**)

$^1\text{H}$  NMR (250 MHz,  $\text{CDCl}_3$ )

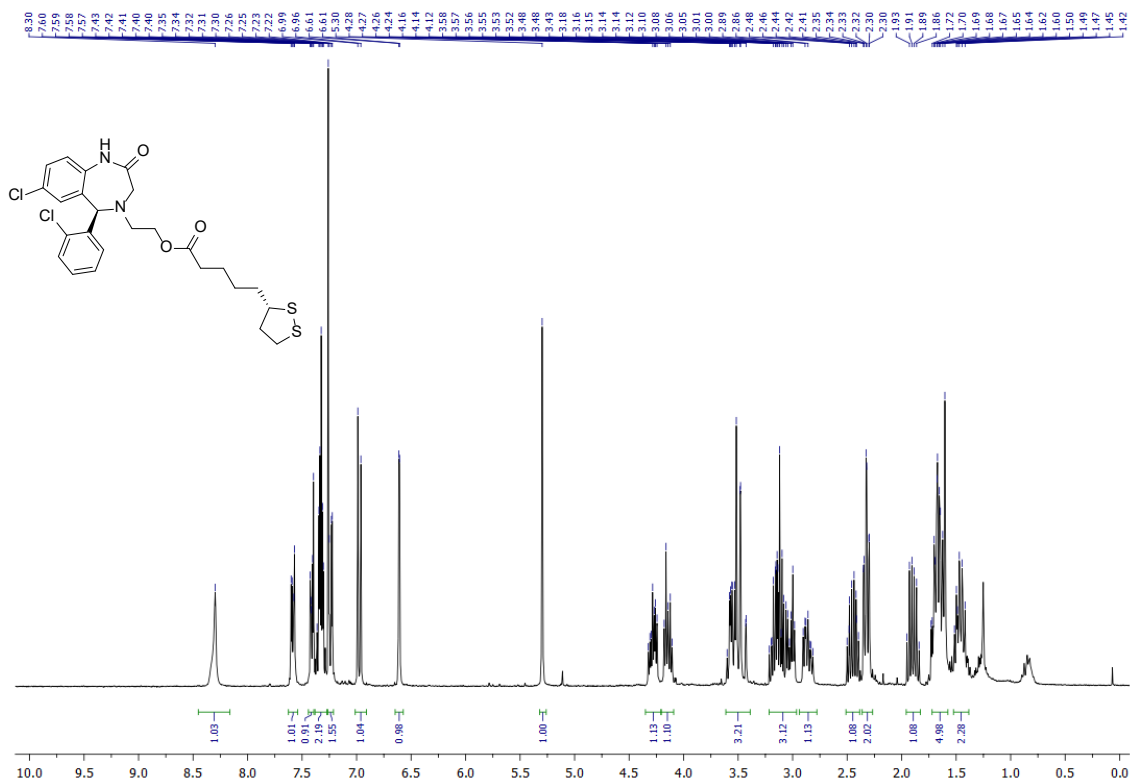

2-((*R*)-7-Chloro-5-(2-chlorophenyl)-2-oxo-1,2,3,5-tetrahydro-4*H*-benzo[*e*][1,4]diazepin-4-yl)ethyl 5-((*R*)-1,2-dithiolan-3-yl)pentanoate (**7d**)

$^1\text{H}$  NMR (250 MHz,  $\text{CDCl}_3$ )

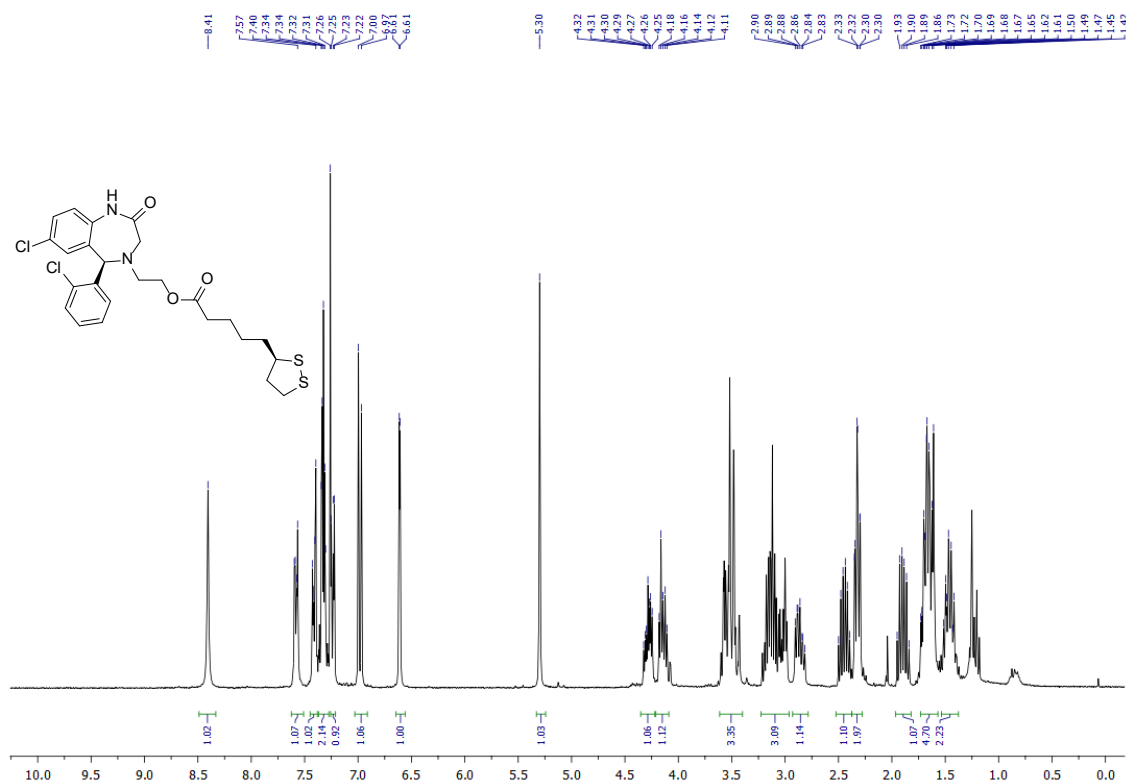

### Copies of chromatograms

(rac)-2-(((2-amino-5-chlorophenyl)(2-chlorophenyl)methyl)amino)ethan-1-ol (**rac-4**)

HPLC (ULTRON ES OVM Chiral Analytical Reverse Phase, 5 $\mu$ m, 4.6 mm x 150 L, buffer HNaPO<sub>4</sub> 20 mM pH 5.9/ CH<sub>3</sub>CN 80:20, flow 1.0 mL/min.

#### Area % Report

Data File: D:\Enterprise\Projects\Default\Result\Diamina pH5.9\_AcCN20%.rslt\Diamina pH5.9\_AcCN20%.rslt.dat  
 Method: D:\Enterprise\Projects\Default\Method\Angel ph59-CH3CN20% 1ml.met  
 Acquired: 4/11/2018 2:01:30 PM (GMT +02:00)  
 Printed: 4/17/2018 4:23:56 PM (GMT +02:00)

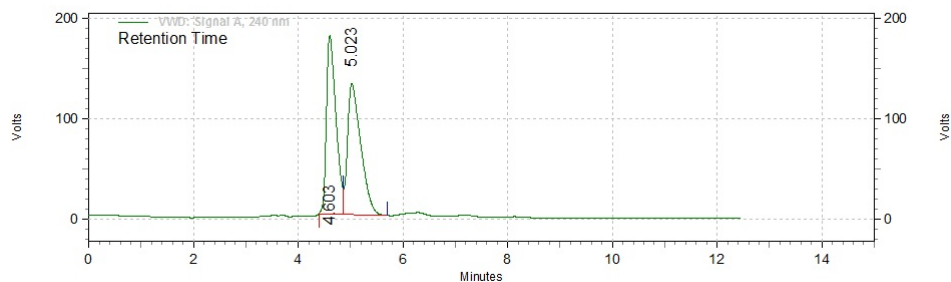

#### VWD: Signal A, 240 nm Results

| Retention Time | Area     | Area % | Height  | Height % |
|----------------|----------|--------|---------|----------|
| 4.603          | 37797369 | 49.52  | 2979248 | 57.70    |
| 5.023          | 38527866 | 50.48  | 2183790 | 42.30    |

|        |          |        |         |        |
|--------|----------|--------|---------|--------|
| Totals | 76325235 | 100.00 | 5163038 | 100.00 |
|--------|----------|--------|---------|--------|

(S)-2-(((2-Amino-5-chlorophenyl)(2-chlorophenyl)methyl)amino)ethan-1-ol (**S-4**)

*ee* 93% The enantiomers were separated by HPLC (ULTRON ES OVM Chiral Analytical Reverse Phase, 5 $\mu$ m, 4.6 mm x 150 L, buffer NaH<sub>2</sub>PO<sub>4</sub> 20 mM pH 5.9/ CH<sub>3</sub>CN 80:20, flow 1.0 mL/min.

## Area % Report

Data File: D:\Enterprise\Projects\Default\Result\diasteroA\_Diamina  
 pH5.9\_AcCN20%b.rslt\diasteroA\_Diamina pH5.9\_AcCN20%b.rslt.dat  
 Method: D:\Enterprise\Projects\Default\Result\diasteroA\_Diamina pH5.9\_AcCN20%b.rslt\Angel  
 ph59-CH3CN20% 1ml.met  
 Acquired: 4/11/2018 2:37:07 PM (GMT +02:00)  
 Printed: 4/17/2018 4:26:54 PM (GMT +02:00)

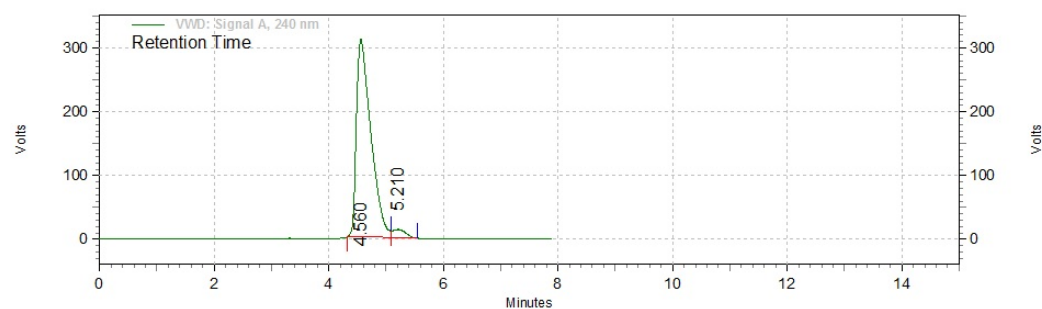

### VWD: Signal A, 240 nm Results

| Retention Time | Area     | Area % | Height  | Height % |
|----------------|----------|--------|---------|----------|
| 4.560          | 91315109 | 96.35  | 5194146 | 95.97    |
| 5.210          | 3463364  | 3.65   | 217952  | 4.03     |

|        |          |        |         |        |
|--------|----------|--------|---------|--------|
| Totals | 94778473 | 100.00 | 5412098 | 100.00 |
|--------|----------|--------|---------|--------|

**(rac)-7-Chloro-5-(2-chlorophenyl)-4-(2-hydroxyethyl)-4,5-dihydro-1H-benzo[*e*][1,4]diazepin-2(3H)-one (rac-6)****Area % Report**

Data File: D:\Enterprise\Projects\Default\Result\bzdrac3.rslt\bzdrac3.rslt.dat  
 Method: D:\Enterprise\Projects\Default\Result\bzdrac3.rslt\Angel ph 59-iPrOH20% 1ml.met  
 Acquired: 3/7/2019 7:14:50 PM (GMT +02:00)  
 Printed: 7/31/2019 2:59:15 PM (GMT +02:00)

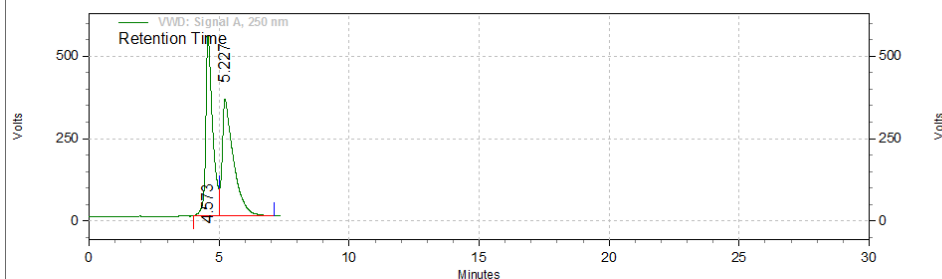**VWD: Signal A,  
250 nm Results**

| Retention Time | Area      | Area % | Height  | Height % |
|----------------|-----------|--------|---------|----------|
| 4.573          | 167514860 | 48.44  | 9151422 | 60.66    |
| 5.227          | 178334005 | 51.56  | 5934470 | 39.34    |

The enantiomers were separated by HPLC (ULTRON ES OVM Chiral Analytical Reverse Phase, 5 $\mu$ m, 4.6 mm x 150 L, buffer NaH<sub>2</sub>PO<sub>4</sub> 20 mM pH 5.9/ *i*-PrOH 80:20, flow 1.0 mL/min.

**(5S)-7-Chloro-5-(2-chlorophenyl)-4-(2-hydroxyethyl)-4,5-dihydro-1H-benzo[*e*][1,4]diazepin-2(3H)-one (S-6)**

*ee* 93% The enantiomers were separated by HPLC (ULTRON ES OVM Chiral Analytical Reverse Phase, 5 $\mu$ m, 4.6 mm x 150 L, buffer NaH<sub>2</sub>PO<sub>4</sub> 20 mM pH 5.9/ *i*-PrOH 80:20, flow 1.0 mL/min.

**Area % Report**

Data File: D:\Enterprise\Projects\Default\Result\ac102a.rslt\ac102a.rslt.dat  
 Method: D:\Enterprise\Projects\Default\Result\ac102a.rslt\Angel ph 59-iPrOH20% 1ml.met  
 Acquired: 3/7/2019 8:23:51 PM (GMT +02:00)  
 Printed: 7/31/2019 3:13:07 PM (GMT +02:00)

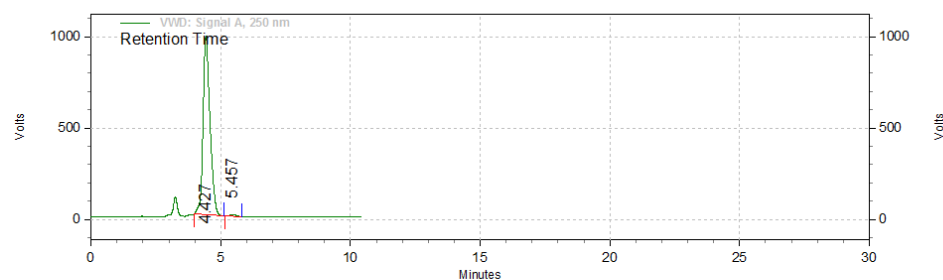**VWD: Signal A,  
250 nm Results**

| Retention Time | Area      | Area % | Height   | Height % |
|----------------|-----------|--------|----------|----------|
| 4.427          | 306622680 | 99.04  | 16399498 | 98.92    |
| 5.457          | 2973713   | 0.96   | 178412   | 1.08     |

|        |           |        |          |        |
|--------|-----------|--------|----------|--------|
| Totals | 309596393 | 100.00 | 16577910 | 100.00 |
|--------|-----------|--------|----------|--------|



(5S)-7-Chloro-5-(2-chlorophenyl)-4-(2-hydroxyethyl)-4,5-dihydro-1H-benzo[*e*][1,4]diazepin-2(3H)-one (**R-6**)

HPLC (ULTRON ES OVM Chiral Analytical Reverse Phase, 5 $\mu$ m, 4.6 mm x 150 L, buffer NaH<sub>2</sub>PO<sub>4</sub> 20 mM pH 5.9/ *i*-PrOH 80:20, flow 1.0 mL/min.

#### Area % Report

Data File: D:\Enterprise\Projects\Default\Result\ac101a.rslt\ac101a.rslt.dat  
 Method: D:\Enterprise\Projects\Default\Result\ac101a.rslt\Angel ph59-iPrOH20% 1ml.met  
 Acquired: 3/7/2019 8:08:44 PM (GMT +02:00)  
 Printed: 7/31/2019 3:07:30 PM (GMT +02:00)

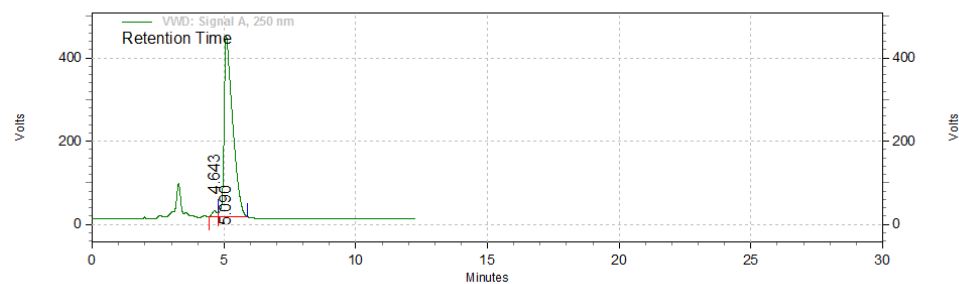

#### VWD: Signal A, 250 nm Results

| Retention Time | Area      | Area % | Height  | Height % |
|----------------|-----------|--------|---------|----------|
| 4.643          | 3077942   | 1.84   | 249477  | 3.29     |
| 5.090          | 163830168 | 98.16  | 7326067 | 96.71    |

|        |           |        |         |        |
|--------|-----------|--------|---------|--------|
| Totals | 166908110 | 100.00 | 7575544 | 100.00 |
|--------|-----------|--------|---------|--------|

### Copies of high-resolution mass spectra

2-((S)-7-Chloro-5-(2-chlorophenyl)-2-oxo-1,2,3,5-tetrahydro-4H-benzo[e][1,4]diazepin-4-yl)ethyl 5-((S)-1,2-dithiolan-3-yl)pentanoate (7a)

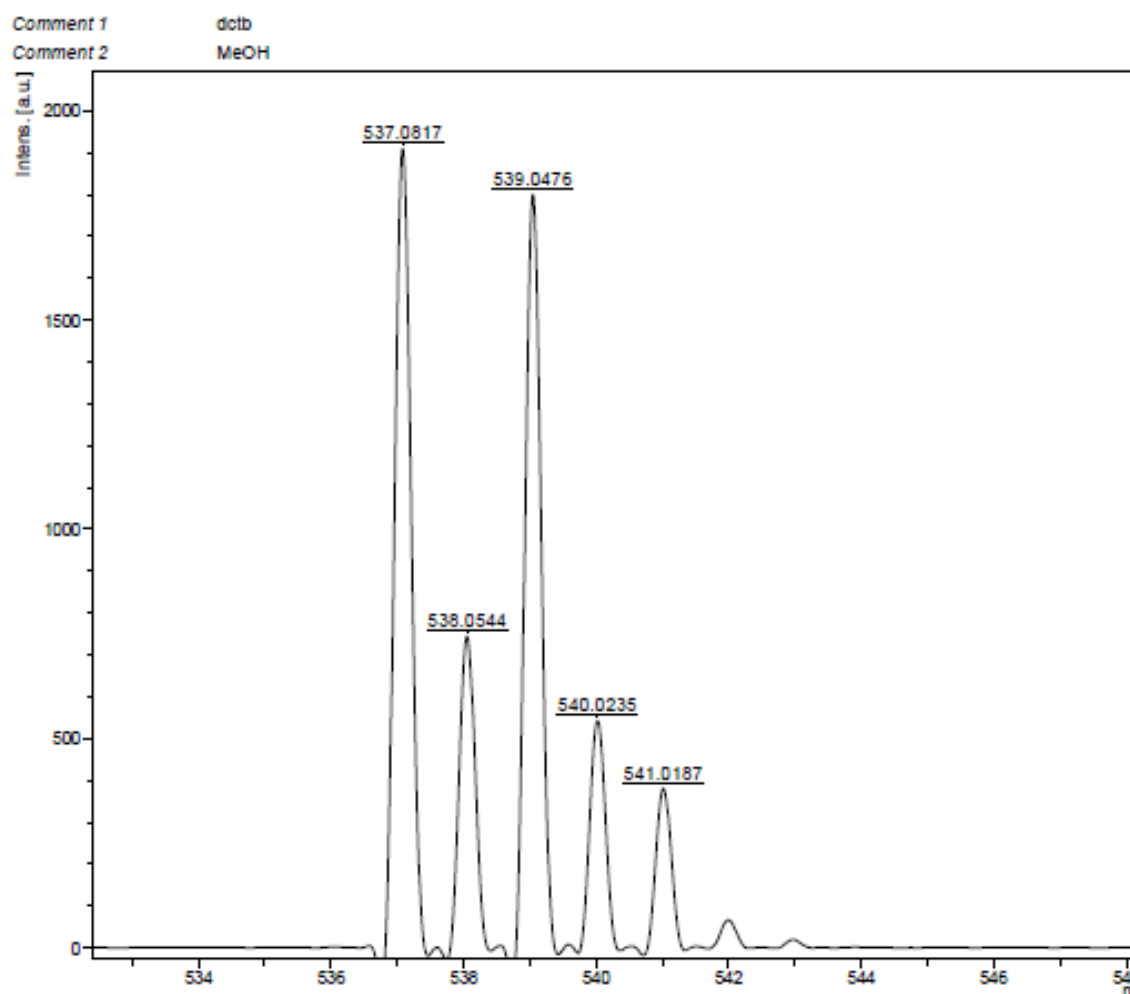

#### Acquisition Parameter

|                                       |                                                              |
|---------------------------------------|--------------------------------------------------------------|
| Date of acquisition                   | 2021-12-22 12:54:17                                          |
| Acquisition method name               | D:\Methods\flexControlMethods\RP_Proteomics_HPC_20211222.par |
| Acquisition operation mode            | Reflector                                                    |
| Voltage polarity                      | POS                                                          |
| Number of shots                       | 200                                                          |
| Name of spectrum used for calibration | 09-00-calpep10_M412                                          |
| Calibration reference list used       | PeptideCalibStandard mono                                    |

2-((R)-7-Chloro-5-(2-chlorophenyl)-2-oxo-1,2,3,5-tetrahydro-4H-benzo[e][1,4]diazepin-4-yl)ethyl 5-((S)-1,2-dithiolan-3-yl)pentanoate (**7b**)

Comment 1 dclb  
Comment 2 MeOH

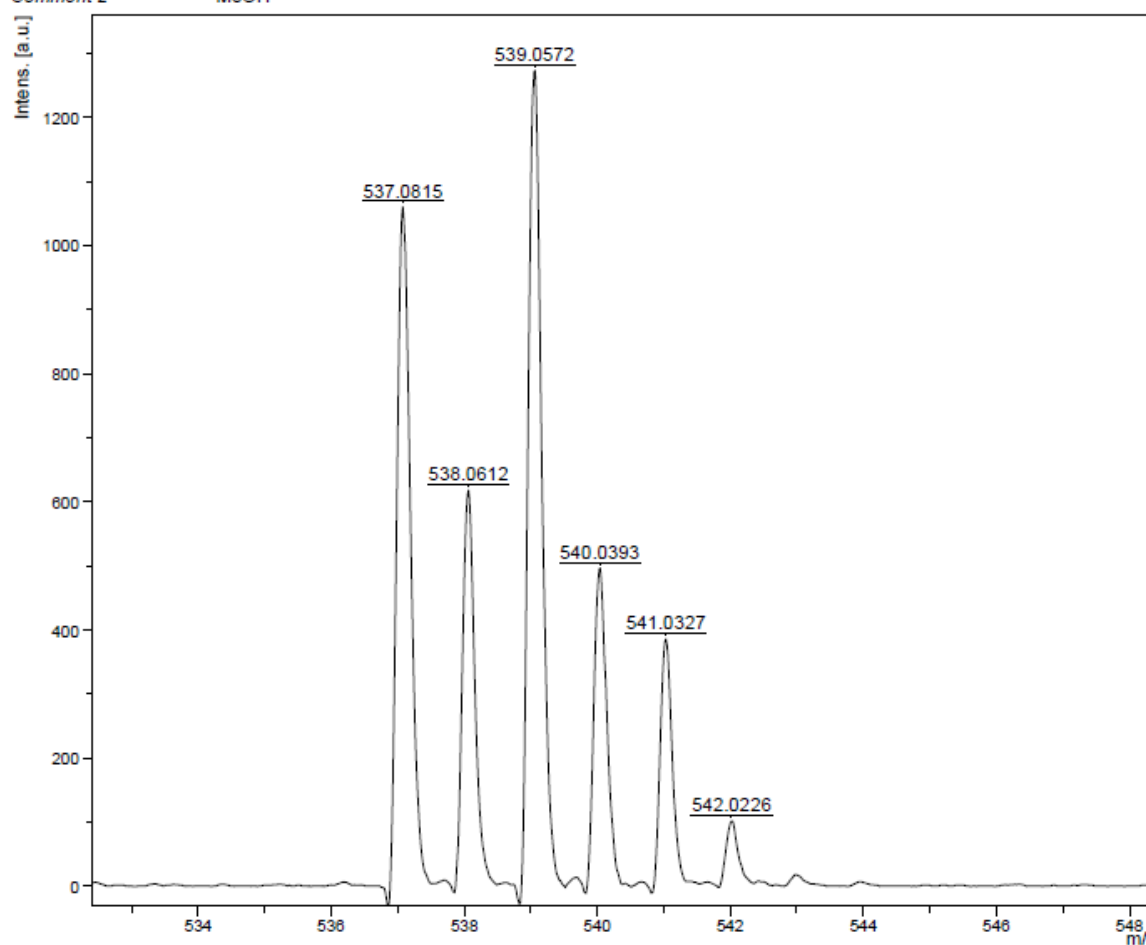

**Acquisition Parameter**

|                                       |                                                              |
|---------------------------------------|--------------------------------------------------------------|
| Date of acquisition                   | 2021-12-22 12:54:39                                          |
| Acquisition method name               | D:\Methods\flexControlMethods\RP_Proteomics_HPC_20211222.par |
| Acquisition operation mode            | Reflector                                                    |
| Voltage polarity                      | POS                                                          |
| Number of shots                       | 200                                                          |
| Name of spectrum used for calibration | 09-00-calpepl0_M412                                          |
| Calibration reference list used       | PeptideCalibStandard mono                                    |

2-((S)-7-Chloro-5-(2-chlorophenyl)-2-oxo-1,2,3,5-tetrahydro-4H-benzo[e][1,4]diazepin-4-yl)ethyl 5-((R)-1,2-dithiolan-3-yl)pentanoate (7c)

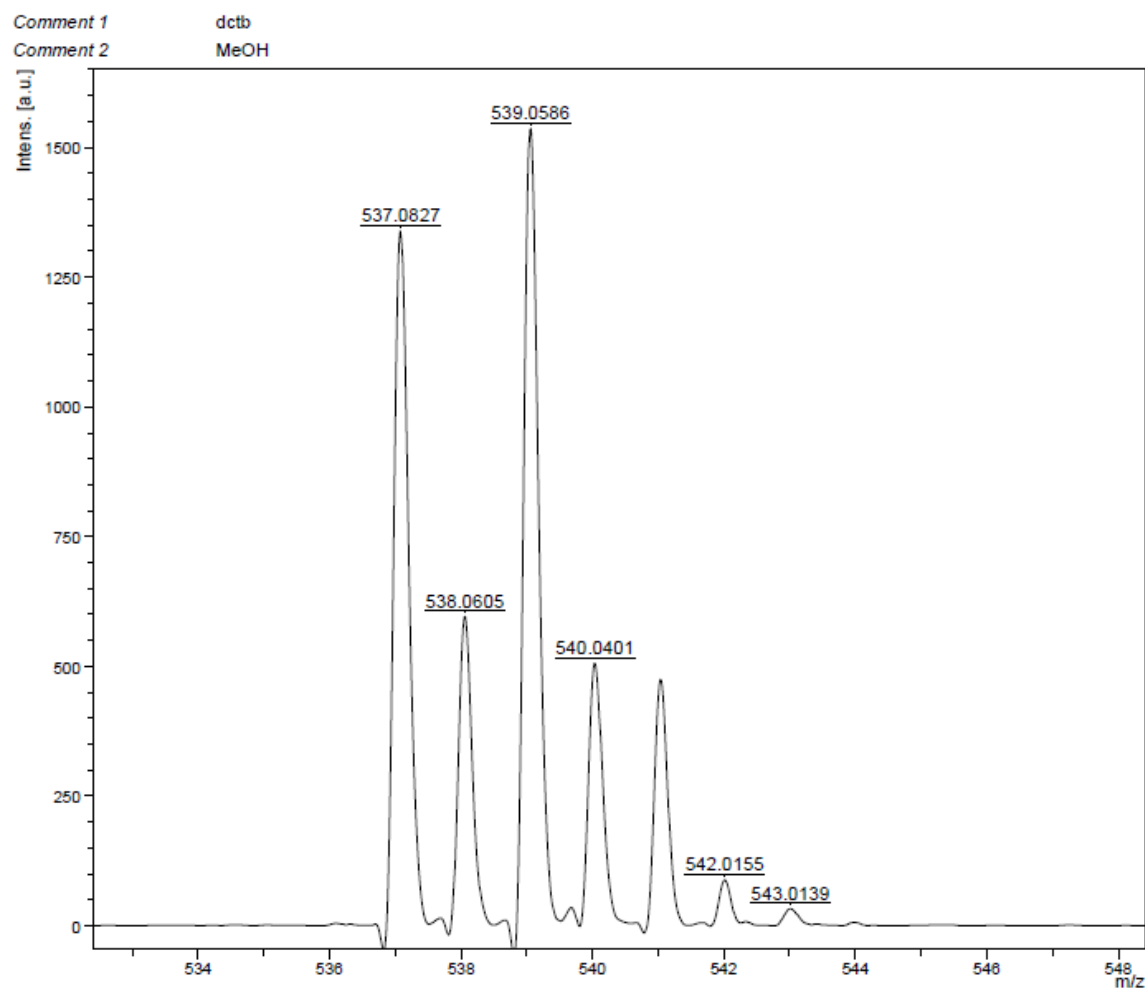

**Acquisition Parameter**

|                                       |                                                              |
|---------------------------------------|--------------------------------------------------------------|
| Date of acquisition                   | 2021-12-22 12:54:53                                          |
| Acquisition method name               | D:\Methods\flexControlMethods\RP_Proteomics_HPC_20211222.par |
| Acquisition operation mode            | Reflector                                                    |
| Voltage polarity                      | POS                                                          |
| Number of shots                       | 200                                                          |
| Name of spectrum used for calibration | 09-00-calpepl0_M4\2                                          |
| Calibration reference list used       | PeptideCalibStandard mono                                    |

2-((R)-7-Chloro-5-(2-chlorophenyl)-2-oxo-1,2,3,5-tetrahydro-4H-benzo[e][1,4]diazepin-4-yl)ethyl 5-((R)-1,2-dithiolan-3-yl)pentanoate (**7d**)

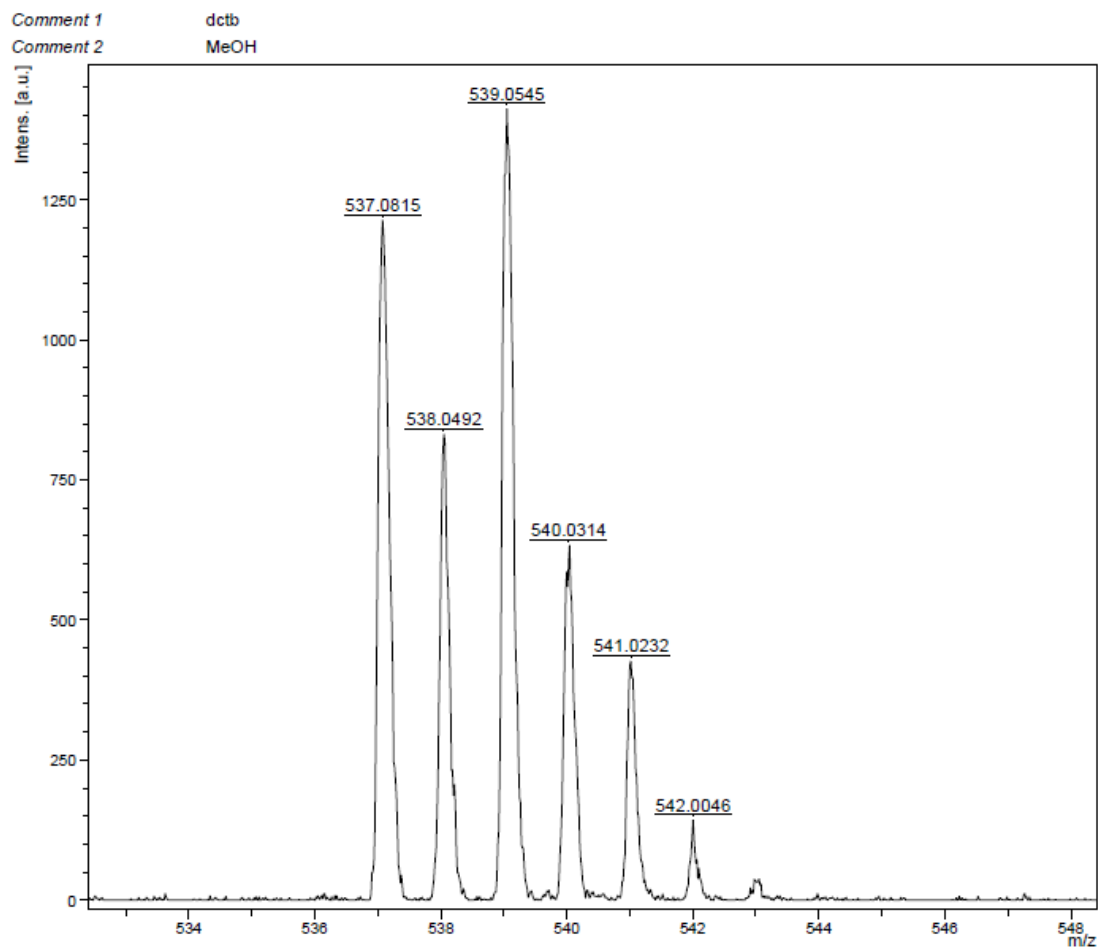

#### Acquisition Parameter

|                                       |                                                              |
|---------------------------------------|--------------------------------------------------------------|
| Date of acquisition                   | 2021-12-22 12:55:09                                          |
| Acquisition method name               | D:\Methods\flexControlMethods\RP_Proteomics_HPC_20211222.par |
| Acquisition operation mode            | Reflector                                                    |
| Voltage polarity                      | POS                                                          |
| Number of shots                       | 200                                                          |
| Name of spectrum used for calibration | 09-00-calpepl0_M412                                          |
| Calibration reference list used       | PeptideCalibStandard mono                                    |
